1           **A partial pathogenicity chromosome in *Fusarium oxysporum* is sufficient to cause**  
2                                           **disease and can be horizontally transferred**

3  
4                                           Jiming Li<sup>1</sup>, Like Fokkens<sup>1</sup>, Lee James Conneely<sup>1</sup>, Martijn Rep<sup>1\*</sup>

5  
6           <sup>1</sup>Molecular Plant Pathology, University of Amsterdam, Amsterdam, 1098 XH, the Netherlands

7           \*Correspondence: Email: [m.rep@uva.nl](mailto:m.rep@uva.nl)

8  
9  
10       **Abstract**

11  
12       During host colonization, plant pathogenic fungi secrete proteins, called effectors, to facilitate  
13       infection. Collectively, effectors may defeat the plant immune system, but usually not all  
14       effectors are equally important for infecting a particular host plant. In *Fusarium oxysporum*  
15       f.sp. *lycopersici*, all known effector genes – also called *SIX* genes – are located on a single  
16       accessory chromosome which is required for pathogenicity and can also be horizontally  
17       transferred to another strain. To narrow down the minimal region required for virulence, we  
18       selected partial pathogenicity chromosome deletion strains by fluorescence-assisted cell  
19       sorting of a strain in which the two arms of the pathogenicity chromosome were labelled with  
20       *GFP* and *RFP*, respectively. By testing the virulence of these deletion mutants, we show that  
21       the complete long arm and part of the short arm of the pathogenicity chromosome are not  
22       required for virulence. In addition, we demonstrate that smaller versions of the pathogenicity  
23       chromosome can also be transferred to a non-pathogenic strain and they are sufficient to turn  
24       the non-pathogen into a pathogen. Surprisingly, originally non-pathogenic strains that had  
25       received a smaller version of the pathogenicity chromosome were much more aggressive than  
26       recipients with a complete pathogenicity chromosome. Whole genome sequencing analysis  
27       revealed that partial deletions of the pathogenicity chromosome occurred mainly close to  
28       repeats, and that spontaneous duplication of sequences in accessory regions is frequent both in  
29       chromosome deletion strains and in horizontal transfer (recipient) strains.

30  
31       **Author Summary**

32  
33       Fungal genomes can often be divided into a core genome, which is essential for growth, and  
34       an accessory genome which is dispensable. The accessory genome in fungi can be beneficial  
35       under some conditions. For example, in some plant-pathogenic fungi, virulence genes are  
36       present in the accessory genome, which enable these fungi to cause disease on certain hosts. In  
37       *Fusarium oxysporum* f.sp. *lycopersici*, which infects tomato, all host-specific virulence genes  
38       are located on a single accessory chromosome. This ‘pathogenicity chromosome’ can be  
39       horizontally transferred between strains. Here, we found that many suspected virulence genes  
40       are in fact not required for virulence because strains without a large part of the pathogenicity  
41       chromosome, including these genes, showed no reduced virulence. In addition, we demonstrate  
42       that partial pathogenicity chromosomes can be horizontally transferred to a non-pathogen.  
43       Surprisingly, originally non-pathogenic strains that had received a partial pathogenicity

44 chromosome were more virulent than strains that had received the complete pathogenicity  
45 chromosome.

46  
47

## 48 **Introduction**

49

50 Accessory chromosomes, also called supernumerary chromosomes, B chromosomes, or  
51 lineage-specific chromosomes, were first discovered in *Hemiptera* in 1907 (1). However, it  
52 was only in 1991 that they were first reported in a fungus; the plant-pathogenic fungus *Nectria*  
53 *haematococca* (*Fusarium solani*) (2). Since then, accessory chromosomes have been found in  
54 more than 20 different species of fungi (3), including the plant pathogens *Fusarium oxysporum*  
55 (Fo) (4–7), *Fusarium solani* (8), and *Zymoseptoria tritici* (9–11). Accessory chromosomes are  
56 generally distinguished from core chromosomes by their relatively high number of repeats,  
57 lower gene density, distinct codon usage, different evolutionary trajectories and dispensability  
58 (12).

59

60 Although accessory chromosomes are dispensable, they can play an important role under  
61 specific conditions, such as conferring pathogenicity to specific plant species (3). For example,  
62 in *Alternaria*, host-selective toxin genes are located on accessory chromosomes which are  
63 responsible for causing disease on certain plant species (13–15). Recent findings in the  
64 hemibiotrophic plant pathogen *Colletotrichum higginsianum* showed that mutants without  
65 chromosome 11 are arrested during the biotrophic phase of infection (16). In contrast, loss of  
66 this chromosome had no clear effect on vegetative fitness, suggesting that this chromosome  
67 plays a specific role during infection (16). One of the most well-documented examples is the  
68 pathogenicity chromosome of Fo f.sp. *lycopersici* (Fol) (4,17,18). While this pathogenicity  
69 chromosome can be lost without affecting normal growth, strains without this pathogenicity  
70 chromosome cannot infect tomato plants (4,16). All 14 known effector genes (*Secreted In*  
71 *Xylem* genes, *SIX* genes) are located on this pathogenicity chromosome (18), and some of these  
72 effector genes were shown to contribute to virulence towards tomato plants, including *SIX1*  
73 (*AVR3*) (19), *SIX3* (*AVR2*) (20), and *SIX5* (21). Further studies on this pathogenicity  
74 chromosome showed that loss of (most of) the long arm (q arm) of this chromosome, including  
75 *SIX6*, *SIX9* and *SIX11*, did not significantly affect virulence (5).

76

77 Apart from conferring advantages in a certain environment, at least some accessory  
78 chromosomes can also be horizontally transferred from one strain to another (4,6,17,22). The  
79 first molecular evidence for horizontal chromosome transfer (HCT) in fungal plant pathogens  
80 was reported in *Colletotrichum gloeosporioides* (23). It was suggested that a 2-Mb  
81 chromosome in the biotype B isolate Bx most likely originated by a relatively recent transfer  
82 from biotype A. Shortly after, He and colleagues experimentally demonstrated horizontal  
83 transfer of a 2-Mb chromosome from biotype A to biotype B, however, no pathogenicity  
84 phenotype was transferred (22).

85

86 HCT has also been observed in Fo (4,6,17). When co-incubating a Fol strain with a non-  
87 pathogenic strain, the pathogenicity chromosome of Fol can be transferred to a non-pathogenic

88 strain, turning the latter into a tomato-infecting strain (4,17). In some cases, a second accessory  
89 chromosome was co-transferred (4). Similarly, from *Fo* f.sp. *radicis-cucumerinum* (Forc), a  
90 single chromosome chr<sup>RC</sup> can be transferred to a non-pathogen, turning the recipient into a  
91 cucurbit-infecting strain (6). The mechanisms behind HCT are largely unknown, but it is most  
92 likely that HCT happens through heterokaryosis, which was supported by the observation that  
93 transfer is not always restricted to accessory chromosomes, but a core chromosome (~4 Mb)  
94 could also be transferred (17).

95

96 In a previous study, we showed that the short arm (p arm) of the pathogenicity chromosome in  
97 *Fol* can be sufficient for causing disease on tomato plants (5). In order to test this hypothesis  
98 and narrow down the genes or regions that are essential for infection in *Fol*, we selected partial  
99 pathogenicity chromosome deletion strains. To achieve this, we inserted the *RFP* gene in the  
100 short arm (p arm) of the pathogenicity chromosome of a strain with the *GFP* gene on the q arm  
101 (16), and used fluorescence-assisted cell sorting to select spores without GFP or RFP (24). By  
102 testing the virulence of these deletion mutants, we show that less than half of the chromosome  
103 is sufficient for causing disease. In addition, we demonstrate that smaller versions of the  
104 pathogenicity chromosome can also be transferred to a non-pathogenic strain, with concomitant  
105 transfer of pathogenicity towards tomato.

106

## 107 **Results:**

### 108 **Construction of a *Fol* strain with *GFP* and *RFP* on either arm of the pathogenicity** 109 **chromosome**

110

111 To be able to select for partial pathogenicity chromosome deletion strains in *Fol*, we set out to  
112 create a strain with the *RFP* gene on the short arm (p arm) and the *GFP* gene on the long arm  
113 (q arm) of the pathogenicity chromosome. Fluorescence-assisted cell sorting (FACS) with this  
114 strain could then be used to select spores without either green fluorescence or red fluorescence.  
115 To construct this strain, the strain 14HG6B with *GFP* on the q arm of the pathogenicity  
116 chromosome was used as a starting point (5). To insert the *RFP* gene on the p arm, single copy  
117 genes *FOXG\_14135* and *FOXG\_16428* with relatively low expression during colonization of  
118 tomato plants (25) were selected for homologous recombination. With the additional purpose  
119 to investigate whether the *SIX10/12/7* gene cluster contributes to virulence, this gene cluster  
120 was also targeted for homologous recombination. The location of these genes is shown in Fig  
121 1A.

122

123 To replace genes with *RFP*, *Agrobacterium*-mediated transformation was performed. For  
124 *SIX10/12/7*, no *in locus* transformant was found after checking 433 transformants in two rounds  
125 of transformation, but two spontaneous *SIX10/12* deletion mutants, 14HG6B\_Δ*SIX10\_12*#1  
126 and 14HG6B\_Δ*SIX10\_12*#2, were found. Since these were derived from the same experiment,  
127 it could be that they are not independent but arose from a single event. In any case, *SIX10* and  
128 *SIX12*, as part of a ~20kb region, were lost in these strains, but *SIX7* was retained. In the effort  
129 to replace *FOXG\_16428* with *RFP*, one *in locus* transformant, 14HG6B\_Δ*FOXG\_16428*, was  
130 obtained out of 945 transformants in three rounds of transformation. However, this

131 transformant also contained (an) ectopic insertion(s) of the *RFP* construct. For the third gene,  
132 *FOXG\_14135*, 300 transformants in two rounds of transformation were checked, and we found  
133 one *in locus* transformant without ectopic insertion, 14HG6B\_ΔFOXG\_14135 (called  
134 **14HGPR** from hereon). Fol transformations are summarized in Table S1. Strain 14HGPR was  
135 confirmed microscopically to have both red and green fluorescence, and *in locus* insertion was  
136 confirmed by PCR.

137

138 To assess the virulence of 14HGPR, bioassays were performed. Disease index and fresh weight  
139 were scored three weeks after inoculation, and no significant reduction of virulence was  
140 observed when comparing 14HGPR with the original strain 14HG6B and an ectopic control  
141 (Fig S1). Thus, 14HGPR was used for FACS experiments to obtain partial deletions of the Fol  
142 pathogenicity chromosome from both arms. In addition, bioassays were performed to assess  
143 virulence of 14HG6B\_ΔSIX10/12#1, 14HG6B\_ΔSIX10/12#2, and 14HG6B\_ΔFOXG\_16428,  
144 and no significant reduction in virulence was observed (data not shown).

145

#### 146 ***GFP* fluorescence is much more frequently lost in spores of 14HGPR than *RFP*** 147 **fluorescence**

148

149 To obtain spontaneous deletions of the Fol pathogenicity chromosome from both arms,  
150 Fluorescence Assisted Cell Sorting (FACS) of strain 14HGPR was performed to select spores  
151 without green or red fluorescence. In total, 26 different cultures were started from single spore  
152 colonies in four different FACS experiments, and from these experiments 43 *GFP* deletion  
153 strains and 18 *RFP* deletion strains were kept for further analysis (Table S2).

154

155 The first FACS experiment served to determine the approximate rate of loss of green or red  
156 fluorescence in cultures of the 14HGPR strain. Six single colonies of 14HGPR were separately  
157 inoculated into NO<sub>3</sub> medium (0.17% yeast nitrogen base, 3% sucrose, 100mM KNO<sub>3</sub>). After  
158 growing for five days, spore suspensions were obtained by filtering cultures through a double  
159 layer of mira-cloth and directly used for FACS. We observed that all the six cultures showed a  
160 similar pattern, with a large population of spores still containing both green and red  
161 fluorescence and a very small fraction without green or red fluorescence (Fig 1B). Strikingly,  
162 in all cultures more spores had lost green fluorescence than spores that had lost red fluorescence,  
163 as shown in Fig 1B. Only one single spore colony which had lost the *RFP* gene was kept for  
164 further analysis from this first experiment (Table S2).

165

166 For the second FACS experiment, 14HGPR was again mono-spored and five single colonies  
167 were transferred directly into NO<sub>3</sub> medium and allowed to grow for five days. This time two  
168 hundred fifty spores without green fluorescence and 226 spores without red fluorescence were  
169 deflected on Potato Dextrose Agar (PDA) plates and allowed to form colonies (Table S3). Only  
170 27 out of 250 (11%) colonies emerged on the plates on which spores without green fluorescence  
171 were deflected, while 199 spores selected for loss of red fluorescence (87%) formed colonies  
172 (Table S3). It turned out that 18 out of the 27 (66.7%) ‘red-selected’ colonies were confirmed  
173 to be GFP negative when checked by microscopy, but only three out of 199 (1.5%) ‘green-  
174 selected’ colonies were truly RFP negative (Table S3). Since spores without red fluorescence

175 were extremely rare, the gating was set close to spores containing both red and green  
176 fluorescence, and this apparently resulted in many false negative spores. The details from all  
177 five cultures are shown in Fig S4. For the 18 ‘red’ and the three ‘green’ colonies, PCR was  
178 used to confirm loss of the *GFP* or *RFP* gene and other regions of the Fol pathogenicity  
179 chromosome (Table S2).

180

181 To obtain more independent deletion strains, a third FACS experiment was performed. With  
182 the aim of increasing the frequency of spontaneous loss of *RFP*, five single colonies of  
183 14HGPR were grown on PDA plates for ten days before collecting and inoculating spores from  
184 plates into NO<sub>3</sub> medium. After five days incubation at 25°C in the NO<sub>3</sub> medium, the spores  
185 were transferred to 4°C for five days and 1 mL of these suspensions were transferred into new  
186 NO<sub>3</sub> medium and allowed to grow for another seven days at 25°C before being subjected to  
187 sorting. Of spores without green fluorescence deflected, 74 out of 250 (30%) formed colonies,  
188 while of spores without red fluorescence deflected, 335 out of 375 (89%) formed colonies  
189 (Table S3). Fluorescence microscopy revealed that 63 out of the 74 (85%) ‘red’ colonies were  
190 truly green fluorescence negative. However, only ten out of 335 (3.0%) ‘green’ colonies were  
191 red fluorescence negative (Table S3). These 63 ‘red’ and ten ‘green’ colonies were also  
192 confirmed by PCR to have lost *GFP* or *RFP*, respectively. The details from all five cultures  
193 are shown in Fig S5. Twenty four out of 63 ‘red’ and nine out of ten ‘green’ deletion strains  
194 were further checked for loss of other regions of the pathogenicity chromosome (Table S2).  
195 Concluding, using a longer culturing regime including incubation at 4°C, an increase in the  
196 frequency of loss of *GFP* was observed for all the five cultures, but no significant increase in  
197 the frequency of loss of *RFP* was observed when compared with the second FACS experiment  
198 (Table S3, Table S4 and Table S5).

199

200 So far, we obtained a large variety of partial deletions from the q arm of the pathogenicity  
201 chromosome, but from the p arm only 13 partial deletion strains with limited variation were  
202 found (Table S2). In a final attempt to obtain more partial deletions from the p arm of the  
203 pathogenicity chromosome, a fourth FACS experiment was performed to only select spores  
204 without red fluorescence. In this case, ten single colonies of 14HGPR were grown on PDA  
205 plates for one month at 25°C, then the spores were collected from the plates and inoculated  
206 into NO<sub>3</sub> medium. The cultures were incubated for five days in NO<sub>3</sub> medium before being used  
207 for FACS. Out of 246 single colonies growing from deflected ‘green’ spores, only five (2%)  
208 had truly lost red fluorescence when checked microscopically (Table S3). PCR of these five  
209 single colonies confirmed that the *RFP* gene was lost in all cases (Table S2). The details from  
210 all ten cultures are shown in Fig S6.

211

## 212 **Illumina whole genome sequencing confirms partial deletions of the Fol pathogenicity** 213 **chromosome and reveals multiplications**

214

215 To more accurately assess which sequences of the pathogenicity chromosome had been lost  
216 and whether changes had also occurred in other parts of the genome, we selected ten deletion  
217 strains with different deletion patterns for Illumina whole genome sequencing (Table S7). Of  
218 these ten deletion strains, six strains had lost part of the q arm, and four strains had lost part of

219 the p arm. To determine sequence changes in the deletion strains, Illumina short-read mapping  
220 of both *GFP* deletion strains and *RFP* deletion strains was performed to the SMRT assembly  
221 of Fol4287 (Fig 2A and Fig 3A; Fig S2 and Fig S3). In addition, genome sequence reads from  
222 three previously obtained deletion strains, named 14-2, 14-4 and 14-7 (5) were mapped to the  
223 newly generated SMRT assembly of Fol4287 (Fig 2A and Fig S2). As a reference, Fol4287  
224 Illumina sequencing reads were retrieved from SRA and were also mapped (Fig 2A and Fig  
225 3A; Fig S2A and Fig S3A).

226

227 All nine *GFP* deletion strains were confirmed to have lost part or complete q arm of the  
228 pathogenicity chromosome (Fig 2A). Strains that had completely lost the q arm of the  
229 pathogenicity chromosome include 14-4, 14-7,  $\Delta$ GFP#20 and  $\Delta$ GFP#26. These deletions had  
230 happened close to or in the centromere region of the pathogenicity chromosome. Three *SIX*  
231 genes are located on the q arm, *SIX9*, *SIX6* and *SIX11*, which were lost in all these four deletion  
232 strains. 14-4 and 14-7 were probably derived from the same deletion event since these two  
233 deletion strains showed exactly the same read density pattern (Fig. 2A). The deletion strains  
234 14-2 and  $\Delta$ GFP#22 still contain a small part of the q arm, but no *SIX* genes are present in this  
235 part. The truncation of the pathogenicity chromosome in strain  $\Delta$ GFP#8 is quite close to *SIX6*,  
236 and *SIX6* was lost in this strain (Table S2). *SIX6* and *SIX11* are present in the deletion strain  
237  $\Delta$ GFP#27, while *SIX9*, *SIX6* and *SIX11* are all present in  $\Delta$ GFP#29.

238

239 In addition to partial or complete deletion of the q arm, multiplication of certain regions of the  
240 remaining part of the pathogenicity chromosome had also occurred for seven out of nine *GFP*  
241 deletion strains (Fig 2A). For all newly obtained deletion strains in this study, multiplication  
242 had occurred in the region where *RFP* was inserted, and this probably happened during  
243 insertion of *RFP* into this location. Part of the population of  $\Delta$ GFP#8 used to prepare genomic  
244 DNA for sequencing probably had lost the multiplication in the *RFP* region as lower read  
245 densities were observed in this region. Duplication of the q arm was only observed for  
246  $\Delta$ GFP#29. Except multiplication of the *RFP* region, other large multiplications of the p arm of  
247 the pathogenicity chromosome were observed for deletion strains 14-2,  $\Delta$ GFP#20,  $\Delta$ GFP#26  
248 and  $\Delta$ GFP#27. Surprisingly, the whole contig 58 was duplicated in the deletion strains 14-4  
249 and 14-7.

250

251 Lastly, to further assess whether deletions or multiplications could be linked to repeats, the  
252 distribution of repeats of the pathogenicity chromosome were determined (Fig 2D). Except for  
253 the deletion in strain  $\Delta$ GFP#22, the remaining eight deletions had occurred close to repeats  
254 (Fig 2A and D). Among them, four deletions had occurred in the centromeric region, and the  
255 other four deletions had occurred close to repeats in different locations. No large changes were  
256 observed in the core genome of the *GFP* deletion strains (Fig S2). Interestingly, however, four  
257 out of the six newly generated deletion strains of the q arm showed the same deletion in contig  
258 47. Additional deletions and duplications in the core genome were only observed for  $\Delta$ GFP#29,  
259 including a relatively large deletion at the end of contig 3, a smaller deletion at the end of contig  
260 7, and a duplication at the end of contig 61.

261

262 The four *RFP* deletion strains all showed different deletion patterns (Fig 3A). Strain  $\Delta$ RFP#11  
263 had only lost a small region of the p arm of the pathogenicity chromosome, including the  
264 *SIX10/SIX12/SIX7* gene cluster. The end of the p arm of this deletion strain was still present.  
265 Strain  $\Delta$ RFP#12 had lost a larger part of the p arm and this lost region including *SIX14*, *SIX1*,  
266 *SIX2*, *SIX3*, *SIX5*, *SIX13*, and *SIX10/12/7*. Interestingly,  $\Delta$ RFP#14 not only had lost part of the  
267 p arm, but it also had lost the end of the q arm. In this deletion strain, only *SIX14*, *SIX1* and  
268 *SIX2* are still present on the p arm of the pathogenicity chromosome. Complete loss of the p  
269 arm of the pathogenicity chromosome was observed for  $\Delta$ RFP#16. In contrast to the common  
270 multiplications observed for most *GFP* deletion strains, multiplications were only observed for  
271 one *RFP* deletion strain,  $\Delta$ RFP#12.

272  
273 In the *RFP* deletion strains, all deletions and multiplications had occurred close to repeats (Fig  
274 3A and D). Surprisingly, all four *RFP* deletion strains had the same deletion in contig 47 as the  
275 *GFP* deletion strains (Fig S3A). Moreover, strain  $\Delta$ RFP#12 contains one relatively large  
276 deletion at the end of contig 2 (Fig S3A and C).

277  
278 To conclude, partial deletions of the pathogenicity chromosome were confirmed for all the  
279 deletion strains. In addition, multiplications and additional deletions were also observed on the  
280 pathogenicity chromosome as well as other parts of the genome in some strains. Lastly, almost  
281 all deletions and multiplications had occurred in or close to repetitive regions.

282  
283

#### 284 **A partial Fol pathogenicity chromosome can be transferred to a non-pathogenic strain**

285  
286 To test which parts of the Fol pathogenicity chromosome can be horizontally transferred,  
287 chromosome transfer experiments were performed (26) by co-incubating each of the selected  
288 24 deletion strains containing different partial deletions with hygromycin or zeocin-resistant  
289 transformants of non-pathogenic strain Fo47 ('recipient strains') in five independent  
290 experiments (Table S8). Since the recipient strains produced more spores than the donor strains,  
291 we decided to co-incubate the donor strains and the recipient strains in different ratios,  
292 including 1:1, 10:1, and 20:1. Chromosome transfer was observed when using ratios of 1:1 or  
293 10:1. Since the transfer frequency was extremely low, no significant difference in transfer  
294 frequency between these ratios could be determined. Co-incubation of donor and recipient  
295 strains was performed on Potato Dextrose Agar (PDA) medium or Czapek Dox Agar (CDA)  
296 in two different experiments (Table S9). Again, no significant difference in transfer frequency  
297 was observed. Since Shahi *et al.* (2016) showed that CAT medium (0.17% YNB, 25mM KNO<sub>3</sub>)  
298 facilitates heterokaryon formation, which could result in horizontal chromosome transfer, we  
299 also co-incubated the donor and recipient strains in CAT medium for three days before plating  
300 spores on PDA or CDA plates in one of the HCT experiments. However, no successful transfer  
301 events were observed (Table S9, HCT\_IV).

302  
303 Through these five experiments, we identified four strains,  $\Delta$ GFP#8,  $\Delta$ GFP#26,  $\Delta$ GFP#29,  
304 and  $\Delta$ RFP#1, with the ability to transfer its partial pathogenicity chromosome to Fo47 (Table

305 S8). Horizontal transfer of partial chromosomes was confirmed by PCR using primers specific  
306 to the recipient strains and primers targeting different parts of the pathogenicity chromosome  
307 (Table S10). For donor strains  $\Delta$ GFP#26 and  $\Delta$ RFP#1, seven double drug-resistant colonies  
308 were found for each, designated HCT\_ $\Delta$ GFP#26-1 to -7 and HCT\_ $\Delta$ RFP#1-1 to -7. For donor  
309 strains  $\Delta$ GFP#8 and  $\Delta$ GFP#29, ten and six double drug-resistant colonies were obtained,  
310 designated HCT\_ $\Delta$ GFP#8-1 to -10 and HCT\_ $\Delta$ GFP#29-1 to -6. Among these donor strains,  
311  $\Delta$ GFP#8,  $\Delta$ GFP#26, and  $\Delta$ GFP#29 had lost different parts of the q arm, while  $\Delta$ RFP#1 had  
312 lost a small part of the p arm. Transfer of partial chromosomes with large deletions of the p  
313 arm were not obtained, despite several attempts (Table S8).

314

315 It was observed earlier that chromosome size can change during horizontal chromosome  
316 transfer (6,17). To assess karyotypes of HCT-strains and donor strains, CHEF gel analysis was  
317 performed (Fig 4). One progeny strain from each donor strain (HCT\_ $\Delta$ RFP#1-7,  
318 HCT\_ $\Delta$ GFP#29-2, HCT\_ $\Delta$ GFP#8-2, and HCT\_ $\Delta$ GFP#26-1) was selected. As expected, all  
319 HCT-strains showed the karyotype of the recipient strain (Fo47) with an extra chromosome.  
320 For HCT\_ $\Delta$ RFP#1-7 and HCT\_ $\Delta$ GFP#8-2, the size of the extra chromosome is similar to the  
321 presumed partial pathogenicity chromosome in donor strains  $\Delta$ RFP#1 and  $\Delta$ GFP#8,  
322 respectively, which is consistent with the PCR results (Table S10) and the sequencing data (Fig  
323 2A). However, in donor strain  $\Delta$ GFP#29, instead of an expected smaller version of the  
324 pathogenicity chromosome as suggested by the PCR and sequencing data (Table S10 and Fig  
325 2A), an extra chromosome of around 4 Mb was observed, suggesting translocation of the  
326 remaining part of the pathogenicity chromosome to another chromosome. After horizontal  
327 chromosome transfer from  $\Delta$ GFP#29 to Fo47, an even larger chromosome (around 5 Mb) was  
328 found in the background of Fo47. In donor strain  $\Delta$ GFP#26, which had lost the whole q arm  
329 of the pathogenicity chromosome (Fig 2A), a larger version (~2.5 Mb) of the pathogenicity  
330 chromosome was observed, which can be explained by the multiplication of the remaining part  
331 of the pathogenicity chromosome (Fig 2A). This ~2.5Mb chromosome apparently became  
332 smaller after horizontal chromosome transfer (around 2 Mb in HCT\_ $\Delta$ GFP#26-1).

333

### 334 **Illumina whole genome sequencing confirms transfer of partial pathogenicity** 335 **chromosomes and reveals duplications during chromosome transfer**

336

337 To identify the sequences involved in karyotype changes (observed from the CHEF gel) during  
338 horizontal chromosome transfer, whole genomes of the HCT-strains HCT\_ $\Delta$ GFP#29-2,  
339 HCT\_ $\Delta$ GFP#8-2 and HCT\_ $\Delta$ GFP#26-1 were sequenced. To identify which sequences were  
340 newly acquired during horizontal chromosome transfer, stringent Illumina short-read mapping  
341 of HCT-strains against the SMRT assembly of Fo4287 was performed (Fig 5 and Fig S4). As  
342 reference, Illumina reads of donor strains were also mapped. As shown in Fig S4, and in  
343 accordance with the karyotype patterns as observed in the CHEF gel, all HCT-strains had the  
344 background of Fo47 with some extra sequences from the respective donor strains. Remarkably,  
345 in HCT-strain HCT\_ $\Delta$ GFP#29-2, the partial pathogenicity chromosome was almost fully  
346 duplicated after horizontal chromosome transfer, and contig 58 was co-transferred (Fig 5 and  
347 Fig S4). This contig 58 corresponds to the co-transferred chromosome in Fo1007 (4).



348 Surprisingly, in the same strain a large part of the accessory contig 47 was also transferred (Fig  
349 S4). This could explain the large chromosome band observed in the CHEF gel (Fig 4).  
350 Consistent with the CHEF gel, HCT\_ΔGFP#8-2 had received the partial pathogenicity  
351 chromosome from the donor strain ΔGFP#8, and no deletions or multiplications were observed  
352 after horizontal chromosome transfer. The partial pathogenicity chromosome from the donor  
353 strain ΔGFP#26 were fully transferred to the HCT-strain HCT\_ΔGFP#26-1, but differences in  
354 multiplication were observed between ΔGFP#26 and HCT\_ΔGFP#26-1. These differences  
355 could explain the chromosome size difference on the CHEF gel (Fig 4). No core chromosome  
356 transfer was observed in any HCT strain (Fig S4).

357

### 358 **Single chromosome sequencing confirms partial pathogenicity chromosomes in both** 359 **donor and HCT strains**

360

361 To further confirm that we correctly identified the putative pathogenicity chromosomes in the  
362 CHEF gel, we cut the putative pathogenicity chromosome bands from the gel and isolated DNA  
363 from the gel pieces for sequencing. In total, eight strains were selected, including three donor  
364 *GFP* deletion strains (ΔGFP#29, ΔGFP#8, ΔGFP#26), three HCT strains (HCT\_ΔGFP#29,  
365 HCT\_ΔGFP#8, HCT\_ΔGFP#26), and two *RFP* deletion strains (ΔRFP#11 and ΔRFP#12).  
366 First, a CHEF gel was run (Fig S5), bands were cut from the gel and 11 samples (Table S7)  
367 were sent for Illumina sequencing. Reads obtained from each sample were mapped to the  
368 SMRT assembly of Fol4287 (Fig S6). Most bands were successfully sequenced and contained  
369 sequences from the pathogenicity chromosome, as expected (Fig S6). For example, band  
370 ΔGFP#8\_SC in donor strain ΔGFP#8 and band HCT\_ΔGFP#8\_SC in the recipient strain  
371 HCT\_ΔGFP#8 were confirmed to both contain the partial pathogenicity chromosome.  
372 Similarly, the bands in the donor strain ΔGFP#26 and the recipient strain HCT\_ΔGFP#26 were  
373 also confirmed to contain the partial pathogenicity chromosome. For the third pair of donor  
374 and recipient strain, ΔGFP#29 and HCT\_ΔGFP#29-2, we observed three extra bands in the  
375 donor (ΔGFP#29) and two extra bands in the recipient strain (HCT\_ΔGFP#29-2). Therefore,  
376 five bands were cut and the isolated DNA sequenced. Probably because of low DNA yield  
377 from the smallest band, ΔGFP#29\_SC\_XS, no reads of this sample could be mapped to the  
378 SMRT assembly. For the other two bands from the donor strain, ΔGFP#29\_SC\_L contained  
379 the partial pathogenicity chromosome, while ΔGFP#29\_SC\_S contained sequences from  
380 contig 7 and part of the pathogenicity chromosome. It is most likely, therefore, that the partial  
381 pathogenicity chromosome was partially duplicated and translocated to core contig 7. For the  
382 corresponding recipient strain HCT\_ΔGFP#29-2, the extra band HCT\_ΔGFP#29\_SC\_L  
383 contained sequences of the pathogenicity chromosome as well as contig 58, and part of contig  
384 47, and all these sequences were originated from the donor strain. This is consistent with the  
385 whole genome mapping data, which showed that these sequences were transferred (Fig S4).  
386 For the second band in the recipient strain, HCT\_ΔGFP#29\_SC\_S, reads mapped abundantly  
387 to core contig 5 and much fewer reads mapped to the pathogenicity chromosome, which we  
388 suspect to be background. Finally, the bands ΔRFP#11\_SC and ΔRFP#12\_SC from *RFP*  
389 deletion strains ΔRFP#11 and ΔRFP#12, respectively, were confirmed to contain the expected  
390 partial pathogenicity chromosome (Fig S6).

391

## 392 **A partial pathogenicity chromosome is sufficient to cause disease on tomato**

393

394 To investigate which parts of the pathogenicity chromosome of Fol are required for virulence,  
395 twenty-two deletion strains (Fig 6) with different deletions in either arm of the pathogenicity  
396 chromosome were selected to assess pathogenicity. In addition, strains 14-2 and 14-7 obtained  
397 earlier, with large deletions in the q arm of the pathogenicity chromosome, and showing no  
398 reduced virulence on tomato in an earlier investigation, were included as controls (5). Again,  
399 we did not observe reduced virulence with these strains. Consistently, deletion strain  $\Delta$ GFP#26,  
400 generated in this study and with complete loss of the q arm of the pathogenicity chromosome  
401 (Fig 2), showed no reduced virulence compared to the parental strain, 14HGPR. We conclude  
402 from this that the entire q arm is not required for virulence under the tested conditions. Strain  
403  $\Delta$ RFP#11, which had lost part of the p arm of the pathogenicity chromosome (Fig 3), including  
404 the *SIX10/12/7* gene cluster, also showed no reduced virulence, suggesting that this part of the  
405 chromosome is also not required for virulence. In contrast, strain  $\Delta$ RFP#14, with a larger  
406 deletion of the p arm, did not show any virulence. Compared to  $\Delta$ RFP#11, *SIX3*, *SIX5* and  
407 *SIX13* were lost in  $\Delta$ RFP#14. Strains  $\Delta$ RFP#12 and  $\Delta$ RFP#16, which had lost an even larger  
408 part of the p arm, also could not cause any disease on tomato plants. Since *SIX3* and *SIX5* have  
409 been shown to contribute to contribute to virulence (20,21), we transformed these to genes  
410 together to strain  $\Delta$ RFP#14, but this did not lead to regaining of virulence (results not shown).

411

## 412 **A partial pathogenicity chromosome can turn an endophyte into a pathogen**

413

414 To investigate whether the endophytic strain Fo47 becomes a pathogen on tomato plants after  
415 receiving a partial Fol pathogenicity chromosome, three HCT-strains derived from each donor  
416 strain were selected to assess their virulence. For the four donor strains,  $\Delta$ RFP#1,  $\Delta$ GFP#29,  
417  $\Delta$ GFP#8 and  $\Delta$ GFP#26, there was no significant difference in virulence compared to the  
418 parental strain 14HGPR (Fig 7). Fo47 could not cause any disease symptoms on tomato plants.  
419 However, all the HCT-strains were pathogenic to tomato plants with some variations in Disease  
420 Index (DI). For HCT-strains derived from  $\Delta$ RFP#1, HCT\_ $\Delta$ RFP#1-5, HCT\_ $\Delta$ RFP#1-6, and  
421 HCT\_ $\Delta$ RFP#1-7, which acquired an almost complete pathogenicity chromosome, a relatively  
422 low disease index was observed (Fig 7 and Fig 8), which is consistent with the results from  
423 previous studies (4,5). Surprisingly, for HCT\_ $\Delta$ GFP#29-1, HCT\_ $\Delta$ GFP#29-2 and  
424 HCT\_ $\Delta$ GFP#29-3, much higher virulence was observed, comparable to, or even stronger than,  
425 the donor strain  $\Delta$ GFP#29 (Fig 7). These HCT strains had large duplications of the  
426 remaining part of the pathogenicity chromosome as well as co-transfer of contig 58 and part of  
427 contig 47 (Fig 8). These two contigs correspond to the accessory part of chromosome 3 and  
428 chromosome 6 of Fol4287, and they also correspond to the second transferred chromosome in  
429 Fol007 (4). Interestingly, for HCT\_ $\Delta$ GFP#8-1, HCT\_ $\Delta$ GFP#8-2 and HCT\_ $\Delta$ GFP#8-3,  
430 derived from  $\Delta$ GFP#8 and HCT\_ $\Delta$ GFP#26-1, HCT\_ $\Delta$ GFP#26-2 and HCT\_ $\Delta$ GFP#26-3,  
431 derived from  $\Delta$ GFP#26, all strains in which only a partial pathogenicity chromosome was  
432 present, higher virulence was also observed compared to HCT strains containing the complete  
433 pathogenicity chromosome (Fig 7 and Fig 8). In these cases, no extra sequences were co-

434 transferred, and in  $\Delta$ GFP#8-derived strains no multiplication of pathogenicity chromosome  
435 sequences was observed.

436

437

## 438 **Discussion**

439

440 The pathogenicity chromosome in Fol is required for infecting tomato plants (4,16), and can  
441 be horizontally transferred to a non-pathogenic strain, turning the latter into a tomato pathogen  
442 (4,5). Here, we narrow down the regions and genes on the Fol pathogenicity chromosome that  
443 are required for virulence. Furthermore, we demonstrate that a partial pathogenicity  
444 chromosome can still be horizontally transferred to a non-pathogenic strain, and this is  
445 sufficient to turn that strain into a pathogen. Surprisingly, transfer of a partial pathogenicity  
446 chromosome leads to higher virulence than transfer of a complete pathogenicity chromosome.  
447 Possibly, sequences in the missing (q) arm suppress virulence in the genetic background of the  
448 non-pathogenic recipient strain, Fo47.

449

### 450 **How many effector genes does Fol need to infect its host?**

451 Effector genes have been predicted and studied in many different plant pathogenic fungi (27–  
452 32), including *Cladosporium fulvum* (33–38), *Fusarium oxysporum* (19,19–21,39,40,40,41),  
453 *Leptosphaeria maculans* (42–48), *Magnaporthe oryzae* (49–54), *Melampsora lini* (31,55,56),  
454 and *Blumeria graminis* (57–59). In many cases, deletion of a single effector gene has little  
455 effect on virulence, suggesting functional redundancy of effectors (28). Nevertheless, it is  
456 likely that a limited number of effectors are required for virulence (5). In Fol, a single  
457 chromosome contains all effector genes (*SIX* genes) required and sufficient for infecting tomato  
458 (4,5,18). This provides the opportunity to study the minimal regions or genes on this  
459 chromosome that are sufficient for infection. Previously, several *SIX* genes have been shown  
460 to contribute to virulence, including *SIX1* (19), *SIX3* (20) and *SIX5* (21). Moreover,  
461 Vlaardingerbroek and coworkers (5) have shown that most of the long (q) arm of the  
462 pathogenicity chromosome, including *SIX9*, *SIX6* and *SIX11*, is not required for virulence. Here,  
463 we confirm that the complete q arm of the pathogenicity chromosome is dispensable for  
464 pathogenicity. We further demonstrate that a large part of the p arm is also not required for  
465 virulence. This part contains *SIX10/12/7* gene cluster, indicating that the in xylem secreted  
466 proteins Six7, Six10 and Six12 are not required for virulence. Deletion strains with a larger  
467 deletion of the p arm are not able to infect tomato plants, suggesting that the remaining part of  
468 the p arm of the pathogenicity chromosome is required for virulence. This region contains  
469 *SIX14*, *SIX1*, *SIX2*, *SIX3*, *SIX5*, and one copy of *SIX13*. We conclude that, although all *SIX*  
470 genes are highly expressed during infection (25) and the corresponding Six proteins are  
471 abundant in the xylem sap of infected tomato plants (18), only a subset of these proteins are  
472 required for virulence.

473

### 474 **Except effector genes, what else on the pathogenicity chromosome does Fol need to infect 475 tomato?**

476 It has been shown that a homolog of transcription factor gene *FTF1* (FOXG\_17084), which is  
477 located close to *SIX2*, can induce expression of most *SIX* genes when overexpressed (25). Two

478 additional homologs of *FTF1* are present on the pathogenicity chromosome – one is close to  
479 *SIX11* and another one is close to the *SIX10/12/7* gene cluster. Deletion strains without either  
480 of the latter two *FTF1* homologs are still fully virulent on tomato plants, indicating that they  
481 are dispensable for virulence. All deletion strains that are still virulent, however, contain the  
482 *FTF1* homolog FOXG\_17084, so this homolog may be important for virulence (25).

483 In addition, a predicted secondary metabolite gene cluster, including seven genes, is located  
484 close to the *SIX10/12/7* gene cluster (18). This cluster can also be lost without affecting  
485 virulence. Besides *SIX14*, *SIX1*, *SIX2*, *SIX3*, *SIX5*, *SIX13* and the *FTF1* homolog FOXG\_17084,  
486 approximately 70 additional predicted protein-coding genes reside within the part of the  
487 pathogenicity chromosome that all virulent deletion strains have in common, and some of these  
488 might contribute to virulence.

489

### 490 **How stable is the Fol genome?**

491 The genomes of many plant pathogenic fungi have a high level of structural variation (8,60–  
492 64), including conserved core genome and lineage-specific regions or chromosomes that are  
493 characterized by a relatively high number of repetitive elements. The core genome is generally  
494 rather stable, but the lineage-specific regions are much more dynamic (5,11,16,65). In Fol  
495 strain 4287, lineage-specific regions include four accessory chromosomes (3, 6, 14 and 15),  
496 part of core chromosome 1 and part of core chromosome 2 (4). The differences in stability (loss  
497 and duplication) between the core genome and the accessory genome has been investigated  
498 previously (5). For example, the loss frequency of lineage-specific chromosomes was  
499 estimated to be approximately 1 in 35,000 in spores in a liquid culture. Surprisingly, core  
500 chromosome 12 in Fol4287 can also be lost but at a very low rate of 1 in 190,000 spores (5,66).  
501 In *Zymoseptoria tritici*, spontaneous accessory chromosome loss rate was much higher with  
502 chromosome loss in 2 to >50% of cells during four weeks of incubation (65). In the present  
503 study, we observed small deletions and duplications in core chromosomes, tending to occur at  
504 the end of chromosomes, as has also been observed in *Zymoseptoria tritici* (65). We also  
505 observed that (part of) the pathogenicity chromosome can be lost frequently (around 6 in  
506 100,000 spores) (Fig 1B). It appeared that the p-arm of the pathogenicity chromosome is more  
507 stable than the q-arm (Fig 1B). However, this could be explained by multiplication of the region  
508 where RFP was inserted in the p-arm (Fig 2). Presumably, this region has undergone  
509 multiplication following homologous recombination in the original strain. To conclude, in Fol,  
510 we can confirm that the core genome is rather stable except for the telomeric regions, while the  
511 accessory chromosomes are relatively dynamic.

512 In the present study, a large variety of deletion and multiplication patterns have been observed  
513 for the pathogenicity chromosome, and almost all the deletions or multiplications have  
514 occurred in or close to repetitive elements. It is well known that repetitive elements can lead to  
515 intra- or inter- chromosome homologous recombination, resulting in deletions or translocations  
516 (67). It has also been shown that in some fungi the facultative heterochromatin mark  
517 H3K27me3 is present in both the subtelomeric regions of the core chromosomes and accessory  
518 chromosomes (12,66). This difference in histone modification compared to the core  
519 chromosomes may play a role in the difference in chromosome stability (66,68).

520 A highly dynamic accessory genome may accelerate the evolution of the pathogen in the arms  
521 race with its host (69). Many effector genes are located in the accessory part of the genome in

522 many plant pathogenic fungi (4,8,70). However, effectors can be recognized by R proteins in  
523 plants, resulting in an immune response. Mutation or loss of effector genes can help to avoid  
524 recognition and regain virulence. The accessory part of the genome may provide a niche for  
525 rapid diversification of effector genes without influencing basic cellular functions.

526

527

## 528 **Materials and Methods**

529

### 530 **Cloning**

531 To replace *FOXG\_14135*, *FOXG\_16428* or *SIX10/12/7* with *RFP*, three constructs  
532 pRW1p\_Pfem1\_RFP\_FOXG\_14135, pRW1p\_Pfem1\_RFP\_FOXG\_16428, and  
533 pRW1p\_Pfem1\_RFP\_SIX10/12/7 were made. Each of them contains a right border  
534 (facilitating *Agrobacterium tumefaciens* mediated transformation), the flanking sequences of  
535 each gene, the *FEM1* promoter, the *RFP* open reading frame (ORF), the *SIX1* terminator, the  
536 *trpC* terminator, the phleomycin ORF resistance cassette, the *gpd* promoter, another flank of  
537 each gene, and the left border. Firstly, pRW2h\_Pfem\_RFP\_Tsix1 was constructed by  
538 amplifying the *RFP* ORF from pPK2-HPH-RFP (41) using primers FP6992  
539 (AAAtctagaATGGCCTCCTCCGAGGACG) and FP6993  
540 (TTTagatctTTAGGCGCCGGTGGAGTGG) followed by *XbaI*-*BglIII* digestion and inserting it  
541 into the *XbaI*-*BglIII* site of pRW2h\_Pfem\_MCS\_Tsix1 (25). Then the hygromycine resistance  
542 cassette of pRW2h\_Pfem\_RFP\_Tsix1 was replaced by the phleomycin resistance cassette of  
543 pRW1p\_Pfem\_MCS\_Tsix1, which was modified from pRW1p (25,40). This resulted in  
544 pRW1p\_Pfem\_RFP\_Tsix1. For the *FOXG\_14135* deletion construct, around 1kb flanking  
545 regions of *FOXG\_14135* were amplified using primers listed in Table S11. The two fragments  
546 were introduced into pRW1p\_Pfem\_RFP\_Tsix1 using the HiFi cloning kit [New England  
547 Biolabs (UK) Ltd.]. The same method was used to make *FOXG\_16428* and *SIX10/12/7*  
548 deletion constructs (Table S11). All constructs were checked by sequencing.

549

### 550 **Gene replacement in Fol**

551 14HG6B was transformed via *Agrobacterium* mediated transformation (Table S1), as  
552 described previously (71). Transformants were monospored by pipetting 10  $\mu$ l of sterile water  
553 on the emerging colony, and spreading this on a fresh Potato Dextrose Agar (PDA) plate  
554 supplemented with cefotaxime and Phleomycin. After two days of growth at 25°C, single  
555 colonies were picked and transferred to fresh plates. From these plates, glycerol stocks were  
556 made and these are the transformants we worked with.

557

### 558 **Fluorescence Assisted Cell Sorting (FACS)**

559 Fluorescence Assisted Cell Sorting was used to select independent chromosome 14 deletion  
560 strains (24). Firstly, 14HGPR was mono-spored and single colonies were transferred to flasks  
561 with NO<sub>3</sub> medium (0.17% yeast nitrogen base, 3% sucrose, 100mM KNO<sub>3</sub>) either directly or  
562 grown on PDA plates for some time before transferring to the NO<sub>3</sub> medium. After growing for  
563 5-7 days, spore suspensions were obtained by filtering cultures through a double layer of mira-  
564 cloth. To select spores without green or red fluorescence, 25 red (not green) and 25 green (not  
565 red) fluorescent spores were deflected on each plate and allowed to form colonies for 2-3 days

566 at 25°C. The colonies were observed using the AMG Evos FL digital inverted microscope to  
567 confirm loss of red fluorescence or green fluorescence. Confirmed colonies were transferred  
568 to new plates and allowed to grow for at least two weeks before DNA extraction. To determine  
569 which parts of the pathogenicity chromosome (chromosome 14) were lost, PCR primers (Table  
570 S12) were used to scan the chromosome.

571

### 572 **Bioassays**

573 To test virulence of Fol transformants, deletion strains or horizontal chromosome transfer  
574 strains on tomato (line C32), the root dip method was used (19). Briefly, spores were collected  
575 from 5-day-old cultures NO<sub>3</sub> medium (0.17% yeast nitrogen base, 3% sucrose, 100mM KNO<sub>3</sub>)  
576 by filtering through miracloth (Merck; pore size of 22–25µm). Spores were centrifuged,  
577 resuspended in sterile MilliQ water, counted, brought to a final concentration of 1\*10<sup>7</sup>  
578 spores/mL and used for root inoculation of 10-day-old tomato seedlings. The seedlings were  
579 then potted individually and kept at 25 °C. Three weeks after inoculation, plant weight above  
580 the cotyledons was measured, and the extent of browning of vessels in the remaining part of  
581 the stem was scored. Disease index was scored on a scale of 0–4 (0, no symptoms; 1, one brown  
582 vessel below the cotyledons; 2, one or two brown vascular bundles at cotyledons; 3, three  
583 brown vascular bundles and growth distortion; 4, all vascular bundles are brown, plant either  
584 dead or very small and wilted).

585

### 586 **Horizontal chromosome transfer**

587 To test whether partial pathogenicity chromosomes can be transferred or not, horizontal  
588 chromosome transfer experiments were performed (26). In total, 24 deletion strains (Table S8)  
589 were selected to co-incubate with Fo47pGRB1 (17) or Fo47-H1 (4). Strains were grown in  
590 minimal liquid medium (3% sucrose, 0.17% yeast nitrogen base and 100mM KNO<sub>3</sub>) for 3-5  
591 days, after which 10<sup>5</sup> or 2x10<sup>5</sup> microconidia from the donor and recipient strains were mixed  
592 in different ratios and co-incubated on PDA or Czapek Dox Agar (CDA) plates for eight days.  
593 Spores were collected from these plates using 2-5 ml sterile MilliQ, filtered through sterile  
594 miracloth and pipetted on a double selective PDA plate containing 0.1 M Tris pH 8  
595 supplemented with 100 µg/ml hygromycin (Duchefa) and 100 µg/ml zeocin (InvivoGen).  
596 Double drug resistant colonies were selected after three days and monospored on a new plate  
597 supplemented with both drugs. After two to three days of growth, colonies were selected and  
598 transferred to new plates supplemented with zeocin and hygromycin. Fluorescence of double  
599 drug-resistant colonies was checked with an AMG Evos FL digital inverted microscope.  
600 Strains with both red and green fluorescence were allowed to grow for 2 weeks before DNA  
601 isolation. Both selection markers and other genes (Table S10) were used to confirm horizontal  
602 chromosome transfer by PCR.

603

### 604 **Contour-clamped homogeneous electric field (CHEF) electrophoresis**

605 To confirm horizontal chromosome transfer, Contour-clamped homogeneous electric field  
606 (CHEF) electrophoresis was performed. Preparation of protoplasts and pulsed-field gel  
607 electrophoresis were performed as described previously (4). *Fusarium* strains were cultured in  
608 100 ml NO<sub>3</sub> medium (0.17% yeast nitrogen base, 100 mM KNO<sub>3</sub> and 3% sucrose) for five days  
609 at 25 °C. Then, conidia were collected by filtering through a double-layer of miracloth and the

610 concentration of spores were measured. Five  $\times 10^8$  conidia were transferred to 40 ml PDB (BD  
611 biosciences). After approximately 16 hours of growth at 25 °C, germinated spores were re-  
612 suspended in 10 ml MgSO<sub>4</sub> solution (1.2 M MgSO<sub>4</sub>, 50 mM sodium citrate, pH 5.8)  
613 supplemented with 50 mg/ml Glucanex (Sigma) + 5 mg/ml driselase (Sigma, D9515) and  
614 incubated for approximately 17 hours at 30°C in a shaking water bath (65 rpm). The protoplasts  
615 were filtered through a double layer of miracloth, collected by centrifugation and casted in  
616 InCert agarose (Lonza) at a concentration of  $2 \times 10^8$  protoplasts per ml. Plugs were treated with  
617 2 mg/ml pronase E at 50°C. Chromosomes were separated by pulsed-field electrophoresis for  
618 260 hours in 1% Seakem Gold agarose (Lonza) at 1.5 V/cm in a CHEF-DR11 system (Biorad)  
619 in  $0.5 \times$  TBE at 4 °C, with switch times between 1200 and 4800 s. The gels were stained with  
620 1µg/mL ethidium bromide in  $0.5 \times$  TBE.

621

### 622 **Single chromosomes recovery from a CHEF gel**

623 Chromosome DNA recovery from CHEF gels were performed according to the method  
624 described previously (72). Chromosome bands of interest were excised from the gel and were  
625 placed in 2 ml microcentrifuge tubes, then heated at 100°C while shaking at 350 rpm for at  
626 least 10 minutes to melt the agarose. After the melting step, six units of thermostable β-agarase  
627 (Nippon gene, Tokyo, Japan) were added to the gel solution, and held at 57°C, 350 rpm for 15  
628 min. After enzyme treatment, tubes were kept on ice for 15 min to confirm the agarose was  
629 completely digested. If remaining agarose was observed in the reaction mixture, melting  
630 (100°C for 10 min) and subsequent steps were repeated. The concentration of DNA in the  
631 reaction mixture was checked by a Qubit 3.0 fluorometer (Invitrogen, Carlsbad, CA, USA) and  
632 the Qubit dsDNA HS Assay kit (Invitrogen).

633

### 634 **Illumina single chromosome and whole genome sequencing**

635 Genomic DNA isolation was performed on freeze-dried mycelium ground in liquid nitrogen as  
636 starting material, using multiple rounds of phenol-chloroform extraction and precipitation, as  
637 well as the Purelink plant total DNA purification kit (Invitrogen).

638 Illumina sequencing (150 bp paired-end, insert size ~500 bp) was performed on a HiSeq 2500  
639 machine at the Hartwig Medical Foundation (Amsterdam, the Netherlands) at ~100X coverage,  
640 resulting in 5.0–5.6 Mb of sequence data per sample.

641 Raw reads were trimmed to remove low-quality bases and adapter sequences using fastq-mcf  
642 v1.04.807 (-q 20). PCR duplicates were removed using PicardTools MarkDuplicates v2.7.1  
643 with standard settings.

644 To assess partial deletions of the pathogenicity chromosome, reads of deletion strains were  
645 mapped directly to the SMRT assembly of Fol4287.

646 Reads from single chromosomes were also mapped directly to the SMRT assembly of Fol4287.  
647 To confirm horizontal chromosome transfer, trimmed reads were directly mapped to SMRT  
648 assembly of Fol4287, and only reads that mapped once with 100% coverage and 100% identity  
649 were selected (with SAMtools view -q 42) when calculating read densities.

650 For visualization of the reads counts in 10 kb non-overlapping sliding windows, SAMtools  
651 bedcov was used. SAMtools version 1.8 was used in all above-mentioned cases.

652

653 **Acknowledgements**

654 We are grateful to Petra Houterman for the help with CHEF gel experiments; Harold Lemereis  
655 and Ludek Tikovsky for plant care; J.L. was financially supported by the China Scholarship  
656 Council program (File number: 201504910768). L.F. was financially supported by the NWO  
657 Talent Scheme Veni (Grant number: 016.veni.181.090). No conflict of interest is declared.

658

659

660 **References:**

- 661 1. Camacho JPM, Sharbel TF, Beukeboom LW. B-chromosome evolution. *Philos Trans*  
662 *R Soc B Biol Sci.* 2000;
- 663 2. Miao VP, Covert SF, Vanetten HD. A fungal gene for antibiotic resistance on a  
664 dispensable (“B”) chromosome. *Science* (80- ). 1991;
- 665 3. Bertazzoni S, Williams AH, Jones DA, Syme RA, Tan K-C, Hane JK. Accessories  
666 Make the Outfit: Accessory Chromosomes and Other Dispensable DNA Regions in  
667 Plant-Pathogenic Fungi. *Mol Plant-Microbe Interact.* 2018;
- 668 4. Ma LJ, Van Der Does HC, Borkovich KA, Coleman JJ, Daboussi MJ, Di Pietro A, et  
669 al. Comparative genomics reveals mobile pathogenicity chromosomes in *Fusarium*.  
670 *Nature.* 2010;
- 671 5. Vlaardingerbroek I, Beerens B, Schmidt SM, Cornelissen BJC, Rep M. Dispensable  
672 chromosomes in *Fusarium oxysporum* f. Sp. *lycopersici*. *Mol Plant Pathol.* 2016;
- 673 6. Van Dam P, Fokkens L, Ayukawa Y, Van Der Gragt M, Ter Horst A, Brankovics B, et  
674 al. A mobile pathogenicity chromosome in *Fusarium oxysporum* for infection of  
675 multiple cucurbit species. *Sci Rep.* 2017;
- 676 7. Williams AH, Sharma M, Thatcher LF, Azam S, Hane JK, Sperschneider J, et al.  
677 Comparative genomics and prediction of conditionally dispensable sequences in  
678 legume-infecting *Fusarium oxysporum* formae speciales facilitates identification of  
679 candidate effectors. *BMC Genomics.* 2016;
- 680 8. Coleman JJ, Rounsley SD, Rodriguez-Carres M, Kuo A, Wasmann CC, Grimwood J,  
681 et al. The genome of *Nectria haematococca*: Contribution of supernumerary  
682 chromosomes to gene expansion. *PLoS Genet.* 2009;
- 683 9. Croll D, Zala M, McDonald BA. Breakage-fusion-bridge Cycles and Large Insertions  
684 Contribute to the Rapid Evolution of Accessory Chromosomes in a Fungal Pathogen.  
685 *PLoS Genet.* 2013;
- 686 10. Schotanus K, Soyer JL, Connolly LR, Grandaubert J, Happel P, Smith KM, et al.  
687 Histone modifications rather than the novel regional centromeres of *Zymoseptoria*  
688 *tritici* distinguish core and accessory chromosomes. *Epigenetics and Chromatin.* 2015;
- 689 11. Habig M, Quade J, Stukenbrock EH. Forward genetics approach reveals host  
690 genotype-dependent importance of accessory chromosomes in the fungal wheat  
691 pathogen *Zymoseptoria tritici*. *MBio.* 2017;
- 692 12. Galazka JM, Freitag M. Variability of chromosome structure in pathogenic fungi-of  
693 “ends and odds.” *Current Opinion in Microbiology.* 2014.
- 694 13. Akagi Y, Akamatsu H, Otani H, Kodama M. Horizontal chromosome transfer, a  
695 mechanism for the evolution and differentiation of a plant-pathogenic fungus.  
696 *Eukaryot Cell.* 2009;
- 697 14. Tsuge T, Harimoto Y, Akimitsu K, Ohtani K, Kodama M, Akagi Y, et al. Host-  
698 selective toxins produced by the plant pathogenic fungus *Alternaria alternata*. *FEMS*  
699 *Microbiology Reviews.* 2013.
- 700 15. Tsuge T, Harimoto Y, Hanada K, Akagi Y, Kodama M, Akimitsu K, et al. Evolution  
701 of pathogenicity controlled by small, dispensable chromosomes in *Alternaria alternata*



- 702 pathogens. *Physiol Mol Plant Pathol*. 2016;
- 703 16. Plaumann PL, Schmidpeter J, Dahl M, Taher L, Koch C. A dispensable chromosome  
704 is required for virulence in the hemibiotrophic plant pathogen *Colletotrichum*  
705 *higginsianum*. *Front Microbiol*. 2018;
- 706 17. Vlaardingerbroek I, Beerens B, Rose L, Fokkens L, Cornelissen BJC, Rep M.  
707 Exchange of core chromosomes and horizontal transfer of lineage-specific  
708 chromosomes in *Fusarium oxysporum*. *Environ Microbiol*. 2016;
- 709 18. Schmidt SM, Houterman PM, Schreiber I, Ma L, Amyotte S, Chellappan B, et al.  
710 MITEs in the promoters of effector genes allow prediction of novel virulence genes in  
711 *Fusarium oxysporum*. *BMC Genomics*. 2013;
- 712 19. Rep M, Van Der Does HC, Meijer M, Van Wijk R, Houterman PM, Dekker HL, et al.  
713 A small, cysteine-rich protein secreted by *Fusarium oxysporum* during colonization of  
714 xylem vessels is required for I-3-mediated resistance in tomato. *Mol Microbiol*. 2004;
- 715 20. Houterman PM, Ma L, Van Ooijen G, De Vroomen MJ, Cornelissen BJC, Takken  
716 FLW, et al. The effector protein Avr2 of the xylem-colonizing fungus *Fusarium*  
717 *oxysporum* activates the tomato resistance protein I-2 intracellularly. *Plant J*. 2009;
- 718 21. Ma L, Houterman PM, Gawehns F, Cao L, Sillo F, Richter H, et al. The AVR2-SIX5  
719 gene pair is required to activate I-2-mediated immunity in tomato. *New Phytol*. 2015;
- 720 22. He C, Rusu AG, Poplawski AM, Irwin JAG, Manners JM. Transfer of a  
721 supernumerary chromosome between vegetatively incompatible biotypes of the fungus  
722 *Colletotrichum gloeosporioides*. *Genetics*. 1998;
- 723 23. Masel AM, He C, Poplawski AM, Irwin JAG, Manners JM. Molecular evidence for  
724 chromosome transfer between biotypes of *Colletotrichum gloeosporioides*. *Mol Plant-*  
725 *Microbe Interact*. 1996;
- 726 24. Vlaardingerbroek I, Beerens B, Shahi S, Rep M. Fluorescence Assisted Selection of  
727 Transformants (FAST): Using flow cytometry to select fungal transformants. *Fungal*  
728 *Genet Biol*. 2015;
- 729 25. van der Does HC, Fokkens L, Yang A, Schmidt SM, Langereis L, Lukasiewicz JM, et  
730 al. Transcription Factors Encoded on Core and Accessory Chromosomes of *Fusarium*  
731 *oxysporum* Induce Expression of Effector Genes. *PLoS Genet*. 2016;
- 732 26. Van Der Does HC, Rep M. Horizontal transfer of supernumerary chromosomes in  
733 fungi. *Methods Mol Biol*. 2012;
- 734 27. de Wit PJGM. *Cladosporium fulvum* Effectors: Weapons in the Arms Race with  
735 Tomato . *Annu Rev Phytopathol*. 2016;
- 736 28. Selin C, de Kievit TR, Belmonte MF, Fernando WGD. Elucidating the role of effectors  
737 in plant-fungal interactions: Progress and challenges. *Frontiers in Microbiology*. 2016.
- 738 29. Lo Presti L, Lanver D, Schweizer G, Tanaka S, Liang L, Tollot M, et al. Fungal  
739 Effectors and Plant Susceptibility. *Annu Rev Plant Biol*. 2015;
- 740 30. Zhang S, Xu JR. Effectors and Effector Delivery in *Magnaporthe oryzae*. *PLoS*  
741 *Pathog*. 2014;
- 742 31. Petre B, Joly DL, Duplessis S. Effector proteins of rust fungi. *Frontiers in Plant*  
743 *Science*. 2014.
- 744 32. Stergiopoulos I, de Wit PJGM. Fungal Effector Proteins. *Annu Rev Phytopathol*. 2009;
- 745 33. Joosten MHAI, Vogelsang R, Cozijnsen TJ, Verberne MC, De Wit PJGM. The  
746 biotrophic fungus *Cladosporium fulvum* circumvents Cf-4-mediated resistance by  
747 producing unstable AVR4 elicitors. *Plant Cell*. 1997;
- 748 34. Hammond-Kosack KE, Tang S, Harrison K, Jones JDG. The tomato Cf-9 disease  
749 resistance gene functions in tobacco and potato to confer responsiveness to the fungal  
750 avirulence gene product Avr9. *Plant Cell*. 1998;
- 751 35. Krüger J, Thomas CM, Golstein C, Dixon MS, Smoker M, Tang S, et al. A tomato

- 752 cysteine protease required for Cf-2-dependent disease resistance and suppression of  
753 autonecrosis. *Science* (80- ). 2002;
- 754 36. Rooney HCE, Van't Klooster JW, Van Der Hoorn RAL, Joosten MHAJ, Jones JDG,  
755 De Wit PJGM. *Cladosporium Avr2* inhibits tomato *Rcr3* protease required for Cf-2-  
756 dependent disease resistance. *Science* (80- ). 2005;
- 757 37. De Jonge R, Van Esse HP, Kombrink A, Shinya T, Desaki Y, Bours R, et al.  
758 Conserved fungal *LysM* effector *Ecp6* prevents chitin-triggered immunity in plants.  
759 *Science* (80- ). 2010;
- 760 38. Sánchez-Vallet A, Saleem-Batcha R, Kombrink A, Hansen G, Valkenburg DJ,  
761 Thomma BPHJ, et al. Fungal effector *Ecp6* outcompetes host immune receptor for  
762 chitin binding through intrachain *LysM* dimerization. *Elife*. 2013;
- 763 39. Rep M, Meijer M, Houterman PM, Van Der Does HC, Cornelissen BJC. *Fusarium*  
764 *oxysporum* evades I-3-mediated resistance without altering the matching avirulence  
765 gene. *Mol Plant-Microbe Interact*. 2005;
- 766 40. Houterman PM, Cornelissen BJC, Rep M. Suppression of plant resistance gene-based  
767 immunity by a fungal effector. *PLoS Pathog*. 2008;
- 768 41. van der Does HC, Duyvesteijn RGE, Goltstein PM, van Schie CCN, Manders EMM,  
769 Cornelissen BJC, et al. Expression of effector gene *SIX1* of *Fusarium oxysporum*  
770 requires living plant cells. *Fungal Genet Biol*. 2008;
- 771 42. Gout L, Fudal I, Kuhn ML, Blaise F, Eckert M, Cattolico L, et al. Lost in the middle of  
772 nowhere: The *AvrLm1* avirulence gene of the Dothideomycete *Leptosphaeria*  
773 *maculans*. *Mol Microbiol*. 2006;
- 774 43. Van de Wouw AP, Lowe RGT, Elliott CE, Dubois DJ, Howlett BJ. An avirulence  
775 gene, *AvrLmJ1*, from the blackleg fungus, *Leptosphaeria maculans*, confers avirulence  
776 to *Brassica juncea* cultivars. *Mol Plant Pathol*. 2014;
- 777 44. Ghanbarnia K, Fudal I, Larkan NJ, Links MG, Balesdent MH, Profotova B, et al.  
778 Rapid identification of the *Leptosphaeria maculans* avirulence gene *AvrLm2* using an  
779 intraspecific comparative genomics approach. *Mol Plant Pathol*. 2015;
- 780 45. Plissonneau C, Daverdin G, Ollivier B, Blaise F, Degrave A, Fudal I, et al. A game of  
781 hide and seek between avirulence genes *AvrLm4-7* and *AvrLm3* in *Leptosphaeria*  
782 *maculans*. *New Phytol*. 2016;
- 783 46. Ghanbarnia K, Ma L, Larkan NJ, Haddadi P, Fernando WGD, Borhan MH.  
784 *Leptosphaeria maculans AvrLm9*: a new player in the game of hide and seek with  
785 *AvrLm4-7*. *Mol Plant Pathol*. 2018;
- 786 47. Plissonneau C, Rouxel T, Chèvre AM, Van De Wouw AP, Balesdent MH. One gene-  
787 one name: the *AvrLmJ1* avirulence gene of *Leptosphaeria maculans* is *AvrLm5*. *Mol*  
788 *Plant Pathol*. 2018;
- 789 48. Petit-Houdenot Y, Degrave A, Meyer M, Blaise F, Ollivier B, Marais CL, et al. A two  
790 genes – for – one gene interaction between *Leptosphaeria maculans* and *Brassica*  
791 *napus*. *New Phytol*. 2019;
- 792 49. Sweigard JA, Carroll AM, Kang Seogchan, Farrall L, Chumley FG, Valent B.  
793 Identification, cloning, and characterization of *PWL2*, a gene for host species  
794 specificity in the rice blast fungus. *Plant Cell*. 1995;
- 795 50. Farman ML, Leong SA. Chromosome walking to the *AVR1-CO39* avirulence gene of  
796 *Magnaporthe grisea*: Discrepancy between the physical and genetic maps. *Genetics*.  
797 1998;
- 798 51. Bryan GT, Wu KS, Farrall L, Jia Y, Hershey HP, McAdams SA, et al. A single amino  
799 acid difference distinguishes resistant and susceptible alleles of the rice blast resistance  
800 gene *Pi-ta*. *Plant Cell*. 2000;
- 801 52. Yoshida K, Saitoh H, Fujisawa S, Kanzaki H, Matsumura H, Yoshida K, et al.

- 802 Association genetics reveals three novel avirulence genes from the rice blast fungal  
803 pathogen *Magnaporthe oryzae*. *Plant Cell*. 2009;
- 804 53. Kanzaki H, Yoshida K, Saitoh H, Fujisaki K, Hirabuchi A, Alaux L, et al. Arms race  
805 co-evolution of *Magnaporthe oryzae* AVR-Pik and rice Pik genes driven by their  
806 physical interactions. *Plant J*. 2012;
- 807 54. Fernandez J, Orth K. Rise of a Cereal Killer: The Biology of *Magnaporthe oryzae*  
808 Biotrophic Growth. *Trends in Microbiology*. 2018.
- 809 55. Lorrain C, Gonçalves dos Santos KC, Germain H, Hecker A, Duplessis S. Advances in  
810 understanding obligate biotrophy in rust fungi. *New Phytologist*. 2019.
- 811 56. Anderson C, Khan MA, Catanzariti AM, Jack CA, Nemri A, Lawrence GJ, et al.  
812 Genome analysis and avirulence gene cloning using a high-density RADseq linkage  
813 map of the flax rust fungus, *Melampsora lini*. *BMC Genomics*. 2016;
- 814 57. Saur IML, Bauer S, Kracher B, Lu X, Franzeskakis L, Müller MC, et al. Multiple pairs  
815 of allelic MLA immune receptor-powdery mildew AVRa effectors argue for a direct  
816 recognition mechanism. *Elife*. 2019;
- 817 58. Liang P, Liu S, Xu F, Jiang S, Yan J, He Q, et al. Powdery Mildews Are Characterized  
818 by Contracted Carbohydrate Metabolism and Diverse Effectors to Adapt to Obligate  
819 Biotrophic Lifestyle. *Front Microbiol*. 2018;
- 820 59. Bourras S, Praz CR, Spanu PD, Keller B. Cereal powdery mildew effectors: a complex  
821 toolbox for an obligate pathogen. *Current Opinion in Microbiology*. 2018.
- 822 60. Johnson LJ, Johnson RD, Akamatsu H, Salamiah A, Otani H, Kohmoto K, et al.  
823 Spontaneous loss of a conditionally dispensable chromosome from the *Alternaria*  
824 *alternata* apple pathotype leads to loss of toxin production and pathogenicity. *Curr*  
825 *Genet*. 2001;
- 826 61. Raffaele S, Kamoun S. Genome evolution in filamentous plant pathogens: Why bigger  
827 can be better. *Nature Reviews Microbiology*. 2012.
- 828 62. Dong S, Raffaele S, Kamoun S. The two-speed genomes of filamentous pathogens:  
829 Waltz with plants. *Current Opinion in Genetics and Development*. 2015.
- 830 63. Vanheule A, Audenaert K, Warris S, van de Geest H, Schijlen E, Höfte M, et al.  
831 Living apart together: Crosstalk between the core and supernumerary genomes in a  
832 fungal plant pathogen. *BMC Genomics*. 2016;
- 833 64. Strom NB, Bushley KE. Two genomes are better than one: history, genetics, and  
834 biotechnological applications of fungal heterokaryons. *Fungal Biol Biotechnol*. 2016;
- 835 65. Möller M, Habig M, Freitag M, Stukenbrock EH. Extraordinary genome instability  
836 and widespread chromosome rearrangements during vegetative growth. *Genetics*.  
837 2018;
- 838 66. Fokkens L, Shahi S, Connolly LR, Stam R, Schmidt SM, Smith KM, et al. The multi-  
839 speed genome of *Fusarium oxysporum* reveals association of histone modifications  
840 with sequence divergence and footprints of past horizontal chromosome transfer  
841 events. *bioRxiv*. 2018;
- 842 67. Hedges DJ, Deininger PL. Inviting instability: Transposable elements, double-strand  
843 breaks, and the maintenance of genome integrity. *Mutat Res - Fundam Mol Mech*  
844 *Mutagen*. 2007;
- 845 68. Möller M, Schotanus K, Soyer JL, Haueisen J, Happ K, Stralucke M, et al.  
846 Destabilization of chromosome structure by histone H3 lysine 27 methylation. Vol. 15,  
847 *PLoS genetics*. 2019. e1008093 p.
- 848 69. Croll D, McDonald BA. The accessory genome as a cradle for adaptive evolution in  
849 pathogens. *PLoS Pathog*. 2012;
- 850 70. Peng Z, Oliveira-Garcia E, Lin G, Hu Y, Dalby M, Migeon P, et al. Effector gene  
851 reshuffling involves dispensable mini-chromosomes in the wheat blast fungus. *PLoS*

- 852 Genet. 2019;  
853 71. Takken FLW, van Wijk R, Michielse CB, Houterman PM, Ram AFJ, Cornelissen  
854 BJC. A one-step method to convert vectors into binary vectors suited for  
855 Agrobacterium-mediated transformation. *Curr Genet.* 2004;  
856 72. Kashiwa T, Kozaki T, Ishii K, Turgeon BG, Teraoka T, Komatsu K, et al. Sequencing  
857 of individual chromosomes of plant pathogenic *Fusarium oxysporum*. *Fungal Genet*  
858 *Biol.* 2017;

859  
860  
861  
862  
863  
864

## 865 **Supporting information**

866

### 867 **Fig S1: Deletion of *FOXG\_14135* does not result in reduced virulence.**

868 Fresh weight (A) and disease index (DI) (B) of infected tomato plants were scored three weeks  
869 after inoculation. When ten days old tomato seedlings were inoculated with  $1 \times 10^7$  spores/mL  
870 at 25°C, the *FOXG\_14135* deletion strain 14HGPR showed similar disease index and fresh  
871 weight as the original strain 14HG6B. As control, disease symptoms of an ectopic transformant  
872 (T-DNA was randomly inserted in the genome) were assessed, and no significant difference in  
873 virulence was observed compared to 14HG6B. Water (Mock)-treated plants were completely  
874 healthy. Disease index was scored on a scale of 0–4 (0, no symptoms; 1, one brown vessel  
875 below the cotyledons; 2, one or two brown vascular bundles at cotyledons; 3, three brown  
876 vascular bundles and growth distortion; 4, all vascular bundles are brown, plant either dead or  
877 very small and wilted). One-way ANOVA was performed on fresh weight. Kruskal-Wallis test  
878 was performed on disease index.

879

### 880 **Fig S2: Illumina whole genome read mapping of *GFP* deletion strains reveals a few 881 minor changes in the core genome.**

882 (A) Whole genome reads of nine *GFP* deletion strains were mapped to the SMRT assembly of  
883 Fol4287. As reference, Illumina reads of Fol4287 itself were also mapped. For comparison of  
884 differences within and between deletion strains, genome coverage was normalized. No obvious  
885 changes were observed in the core genome of the three previously generated strains 14-4, 14-  
886 7, and 14-2. For all the deletion strains generated in this study, the same small deletion was  
887 observed at the end of contig 0. In addition,  $\Delta$ GFP#20,  $\Delta$ GFP#22,  $\Delta$ GFP#8, and  $\Delta$ GFP#29 all  
888 showed the same deletion in contig 47. For  $\Delta$ GFP#29, deletions at the end of contig 3 and  
889 contig 7 and one duplication at the end of contig 61 were also observed. GC content (B) and  
890 repeat distribution across the genome (C) are also displayed.

891

### 892 **Fig S3: Illumina whole genome read mapping of *RFP* deletion strains reveals a few 893 minor changes in the core genome.**

894 (A) Whole genome reads of four *RFP* deletion strains were mapped to the SMRT assembly of  
895 Fol4287. As reference, Illumina reads of Fol4287 itself were also mapped. For comparison of

896 differences within and between deletion strains, genome coverage was normalized. For all the  
897 deletion strains, the same small deletion was observed at the end of contig 0 and in the middle  
898 of contig 47. For  $\Delta$ RFP#12, a deletion at the end of contig 2 was observed. GC content (B) and  
899 repeat distribution across the genome (C) are also displayed.

900

901 **Fig S4: Stringent selection of mapped Illumina reads of HCT strains and donor strains**  
902 **to the SMRT assembly of Fol4287 shows absence of core chromosome transfer and**  
903 **confirms transfer of accessory regions.**

904 (A) Illumina reads of HCT strains (HCT\_ $\Delta$ GFP#29-2, HCT\_ $\Delta$ GFP#8-2 and HCT\_ $\Delta$ GFP#26-  
905 1) and their respective donor strains ( $\Delta$ GFP#29,  $\Delta$ GFP#8 and  $\Delta$ GFP#26-1) were mapped to  
906 the SMRT assembly of Fol4287, and only those reads that mapped completely and without any  
907 mismatches were selected. In the case of transfer of core chromosomes, a high density of  
908 perfectly mapped reads was expected, even in the sub-telomeric regions as shown for the  
909 reference donor strains. No core chromosome transfer was observed for any HCT strain.  
910 (Partial) pathogenicity chromosome transfer was confirmed for all HCT strains. In  
911 HCT\_ $\Delta$ GFP#29-2, co-transfer of contig 58 and part of contig 47 was observed. GC content  
912 (B) and repeat distribution across the genome (C) are also displayed.

913

914 **Fig S5: Single chromosomes cut from a CHEF gel for sequencing.**

915 Eight strains were selected for chromosome separation in a CHEF gel. In total, 11 bands were  
916 cut from the gel (1 to 11) and sent for sequencing. The numbers are indicated on the respective  
917 bands. The same number indicates corresponding bands from the same strain. The name used  
918 in the main text for each number is listed below the gel. Chromosomes of *S. cerevisiae* were  
919 used as marker.

920

921 **Fig S6: Single chromosome sequencing confirms partial pathogenicity chromosomes in**  
922 **both donor and HCT strains.**

923 (A) Illumina reads of 11 bands cut from a CHEF gel (see Fig. S5) were mapped to the SMRT  
924 assembly of Fol4287. As reference, Illumina reads of Fol4287 itself were also mapped. Except  
925 band  $\Delta$ GFP#29\_SC\_XS, which was not successfully sequenced, the remaining ten bands  
926 indeed contained sequences of the pathogenicity chromosome (contig 14). For example, the  
927 same partial pathogenicity chromosome is present in donor strains ( $\Delta$ GFP#8 and  $\Delta$ GFP#26)  
928 and the respective recipient strains (HCT\_ $\Delta$ GFP#8-2 and HCT\_ $\Delta$ GFP#26-1). Band  
929  $\Delta$ GFP#29\_SC\_S contained sequences from contig 7 and part of the pathogenicity chromosome.  
930 Instead of band HCT\_ $\Delta$ GFP#29\_SC\_S, band HCT\_ $\Delta$ GFP#29\_SC\_L was confirmed to be the  
931 transferred chromosome, containing sequences of the pathogenicity chromosome as well as  
932 contig 58 and part of contig 47. GC content (B) and repeat distribution across the genome (C)  
933 are also displayed.

934

935 **Table S1: Summary of *Agrobacterium*-mediated *Fusarium* transformations.**

936

937 **Table S2: Fol pathogenicity chromosome deletion strains obtained.**

938 Symbols used in the table: + for positive PCR result, - for negative PCR result; grey regions  
939 without symbol for presumed presence, white regions without symbols for presumed absence.

940

941 **Table S3. Summary of three Fluorescence Assisted Cell Sorting (FACS) experiments.**

942

943 **Table S4. Details of the second Fluorescence Assisted Cell Sorting (FACS) experiment.**

944

945 **Table S5. Details of the third Fluorescence Assisted Cell Sorting (FACS) experiment.**

946

947 **Table S6. Details of the fourth Fluorescence Assisted Cell Sorting (FACS) experiment.**

948

949 **Table S7: Strains and single chromosomes sent for sequencing.**

950

951 **Table S8. Summary of Horizontal Chromosome Transfer (HCT) experiments.**

952 No: no successful transfer; Yes: successful transfer. Only strains for which transfer was  
953 attempted are shown in this table.

954

955 **Table S9. Different strain ratios and media used in five HCT experiments.**

956 PDA: potato dextrose agar; CDA: Czapek Dox Agar. CAT medium: 0.17% YNB, 25 mM  
957  $\text{KNO}_3$ .

958

959 **Table S10. Horizontal chromosome transfer was confirmed by PCR.**

960 Symbols used in the table: + for positive PCR result, - for negative PCR result; black regions  
961 without symbol are presumed to be present, white regions without symbols are presumed to be  
962 absent.

963

964 **Table S11: Primers used for cloning.**

965

966 **Table S12: Markers on the pathogenicity chromosome.**

967

968

969

## 970 **Figure legends**

971

972 **Fig 1: In cultures of Fol strain 14HGPR, loss of green fluorescence is much more**  
973 **frequent than loss of red fluorescence.**

974 (A) Schematic representation of the Fol pathogenicity chromosome and genes selected for  
975 replacement with *RFP*. The long arm is indicated as q arm, while the short arm is indicated as  
976 p arm. (B) Dot plot of a fluorescence assisted cell sorting experiment. Each blue dot represents  
977 a fungal spore. Most spores contain both red and green fluorescence. Some spores had lost  
978 green fluorescence, while very few spores had lost red fluorescence. Axis labels show the  
979 detection channel (X-axis:  $\lambda=488\text{nm}$ ; Y-axis:  $\lambda=561\text{nm}$ ).

980

981 **Fig 2: Illumina read mapping confirms partial deletions and reveals multiplications in**  
982 **the Fol pathogenicity chromosome in GFP deletion strains.**

983 (A) Reads of nine GFP deletion strains were mapped to the SMRT assembly of Fol4287. As  
984 reference, Illumina reads of Fol4287 itself was also mapped. For comparison of differences  
985 within and between deletion strains, all genome coverage was normalized. All deletion strains  
986 had lost part of or the complete q arm of the pathogenicity chromosome. In addition,  
987 multiplications had occurred in the remaining part of the pathogenicity chromosome or contig  
988 58 in some deletion strains. Part of contig 58 belongs to the pathogenicity chromosome as  
989 indicated between the solid and dotted lines. (B) Schematic representation of the pathogenicity  
990 chromosome (contig 14 and part of contig 58) and, for comparison, the rest of contig 58.  
991 Secreted In Xylem (SIX) genes are also indicated. GC content (C) and repeat distribution across  
992 the genome (D) are also displayed.

993

994 **Fig 3: Illumina read mapping confirms partial deletions and reveals multiplications in**  
995 **the Fol pathogenicity chromosome in RFP deletion strains.**

996 (A) Reads of four RFP deletion strains were mapped to the SMRT assembly of Fol4287. As  
997 reference, Illumina reads of Fol4287 itself was also mapped. For comparison of differences  
998 within and between deletion strains, all genome coverage was normalized. All deletion strains  
999 had lost part or complete p arm of the pathogenicity chromosome. Multiplications had occurred  
1000 only in  $\Delta$ RFP#12. Surprisingly, the end of the q arm was lost in  $\Delta$ RFP#14. Part of the contig  
1001 58 belongs to the pathogenicity chromosome as indicated between the solid and dotted lines.  
1002 (B) Schematic representation of the pathogenicity chromosome (contig 14 and part of contig  
1003 58) and, for comparison, the rest of contig 58. Secreted In Xylem (SIX) genes are also indicated.  
1004 GC content (C) and repeat distribution across the genome (D) are also displayed.

1005

1006 **Fig 4: Contour-clamped homogeneous electric field (CHEF) electrophoresis confirms**  
1007 **horizontal chromosome transfer.**

1008 HCT-strains HCT\_ $\Delta$ RFP#1-7, HCT\_ $\Delta$ GFP#29-2, HCT\_ $\Delta$ GFP#8-2, and HCT\_ $\Delta$ GFP#26-1  
1009 all showed the karyotype of the recipient strain (Fo47), with an extra chromosome indicated  
1010 with a red arrow. The extra chromosome in HCT\_ $\Delta$ RFP#1-7 and HCT\_ $\Delta$ GFP#8-2 is of a size  
1011 similar to that of the partial pathogenicity chromosome in the donor strains  $\Delta$ RFP#1 and  
1012  $\Delta$ GFP#8 (red arrows), respectively. However, the extra chromosome in HCT\_ $\Delta$ GFP#29-2 and  
1013 HCT\_ $\Delta$ GFP#26-1 is of a different size compared to the extra chromosome in donor strain  
1014  $\Delta$ GFP#29 and  $\Delta$ GFP#26, respectively (red arrows). Chromosomes of *S. pombe* was used as a  
1015 marker. The figure was cropped.

1016

1017 **Fig 5: Stringent mapping of Illumina reads of HCT strains and donor strains to the**  
1018 **SMRT assembly of Fol4287 confirms partial pathogenicity chromosome transfer.**

1019 (A) Illumina reads of three HCT strains (HCT\_ $\Delta$ GFP#29-2, HCT\_ $\Delta$ GFP#8-2 and  
1020 HCT\_ $\Delta$ GFP#26-1) and their respective donor strains ( $\Delta$ GFP#29,  $\Delta$ GFP#8 and  $\Delta$ GFP#26-1)  
1021 were mapped to the SMRT assembly of Fol4287, and only those reads that mapped completely  
1022 and without any mismatches were selected. As reference, Illumina reads of Fol4287 were also  
1023 mapped. Partial pathogenicity chromosome transfer was confirmed for all HCT strains.

1024 Surprisingly, in HCT\_ΔGFP#29-2, co-transfer contig 58 was observed while this was not  
1025 observed for the other two HCT strains. In HCT\_ΔGFP#29-2, large multiplications of the  
1026 remaining part of the pathogenicity chromosome and the end of contig 58 (not part of the  
1027 pathogenicity chromosome) were also observed. Sequence multiplication during horizontal  
1028 chromosome transfer was also observed in HCT\_ΔGFP#26-1, but not in HCT\_ΔGFP#8-2. (B)  
1029 Schematic representation of the pathogenicity chromosome (contig 14 and part of contig 58)  
1030 and, for comparison, the rest of contig 58. Location of *SIX* genes and *GFP* and *RFP* are  
1031 indicated. GC content (C) and repeat distribution across the genome (D) are also displayed.

1032

1033 **Fig 6: A partial pathogenicity chromosome in *Fol* is sufficient to cause disease on tomato**  
1034 **plants.**

1035 Bioassays were performed to assess virulence of deletion strains. Ten days old tomato seedlings  
1036 were inoculated with  $1 \times 10^7$  spores/mL at 25°C, and disease index (DI) of infected tomato  
1037 plants was scored three weeks after inoculation. 14HGPR showed no reduced virulence  
1038 compared to the parental strain 14HG6B. Deletion strains 14-2, 14-7 and ΔGFP#26, with  
1039 almost complete loss of the q arm, showed no reduced virulence. Similarly, ΔRFP#11 without  
1040 the *SIX10/12/7* gene cluster showed no reduced virulence. Deletion strains with a larger  
1041 deletion of the p arm (ΔRFP#12, ΔRFP#14 and ΔRFP#16) did not cause disease on tomato  
1042 plants. Disease index was scored on a scale of 0–4 (0, no symptoms; 1, one brown vessel below  
1043 the cotyledons; 2, one or two brown vascular bundles at cotyledons; 3, three brown vascular  
1044 bundles and growth distortion; 4, all vascular bundles are brown, plant either dead or very small  
1045 and wilted). Kruskal-Wallis test was performed on disease index.

1046

1047 **Fig 7: A partial pathogenicity chromosome can turn an endophyte into a pathogen.**

1048 Bioassays were performed to assess the virulence of HCT strains. Ten days old tomato  
1049 seedlings were inoculated with  $1 \times 10^7$  spores/mL at 25°C, and disease index (DI) of infected  
1050 tomato plants was scored three weeks after inoculation. All four donor strains, ΔRFP#1,  
1051 ΔGFP#29, ΔGFP#8 and ΔGFP#26 caused similar disease index compared to 14HGPR.  
1052 Fo47\_GRB1 did not cause any disease symptoms on tomato plants, while all HCT strains in  
1053 the background of Fo47\_GRB1 were able to cause disease on tomato plants, with some  
1054 variation in Disease Index (DI). Disease index was scored on a scale of 0–4 (0, no symptoms;  
1055 1, one brown vessel below the cotyledons; 2, one or two brown vascular bundles at cotyledons;  
1056 3, three brown vascular bundles and growth distortion; 4, all vascular bundles are brown, plant  
1057 either dead or very small and wilted). Kruskal-Wallis test was performed on disease index.

1058

1059 **Fig 8: A partial pathogenicity chromosome in *Fusarium oxysporum* is sufficient to cause**  
1060 **disease and can be horizontally transferred.**

1061 Graphical summary of key observations. Strain ΔRFP#1 with a small deletion in the *RFP*  
1062 region of the pathogenicity chromosome was still able to cause disease on tomato plants. In  
1063 addition, it was able to transfer its pathogenicity chromosome to Fo47, turning the recipient  
1064 strain into a tomato-infecting strain but with only mild virulence. Deletion strain ΔGFP#29 had  
1065 lost a large part of the long (q) arm of the pathogenicity chromosome (white bar) and underwent  
1066 a duplication of the remaining part of the q arm (yellow bar). This deletion strain still caused



1067 disease on tomato plants. Surprisingly, not only the partial pathogenicity chromosome but also  
1068 (the rest of) contig 58 and part of contig 47 were transferred from  $\Delta$ GFP#29 to Fo47. These  
1069 transferred sequences most likely form one big chromosome, according to single chromosome  
1070 sequencing (Fig S6) and CHEF gel analysis (Fig S5). The resulting HCT strain  
1071 HCT\_ $\Delta$ GFP#29-2 caused severe disease on tomato plants. Deletion strain  $\Delta$ GFP#8 had lost a  
1072 large part of the q arm of the pathogenicity chromosome but it still caused disease on tomato  
1073 plants. The partial pathogenicity chromosome in  $\Delta$ GFP#8 could be transferred into Fo47,  
1074 turning the recipient strain into a tomato pathogen (HCT\_ $\Delta$ GFP#8-2) with the same virulence  
1075 as its donor,  $\Delta$ GFP#8. Deletion strain  $\Delta$ GFP#26 had completely lost the q arm of the  
1076 pathogenicity chromosome and underwent an almost complete duplication of the short arm (p  
1077 arm). This version of the pathogenicity chromosome could also be transferred into Fo47. Both  
1078 the donor strain  $\Delta$ GFP#26 and the recipient strain HCT\_ $\Delta$ GFP#26-1 caused disease on tomato  
1079 plants to similar levels.

**A**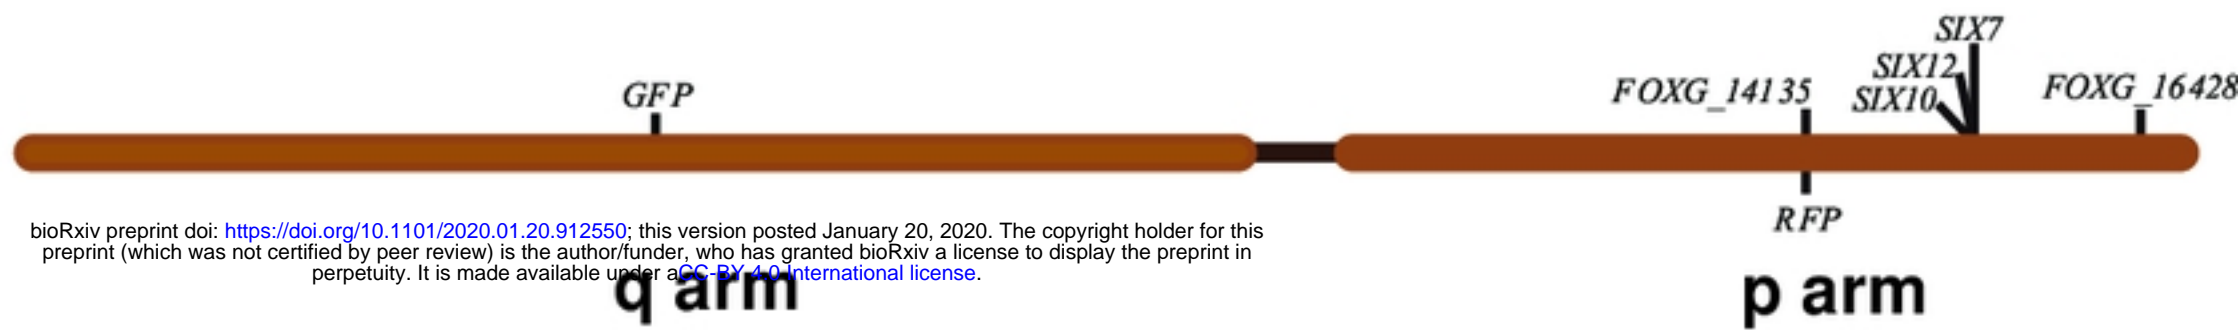

bioRxiv preprint doi: <https://doi.org/10.1101/2020.01.20.912550>; this version posted January 20, 2020. The copyright holder for this preprint (which was not certified by peer review) is the author/funder, who has granted bioRxiv a license to display the preprint in perpetuity. It is made available under aCC-BY 4.0 International license.

**B**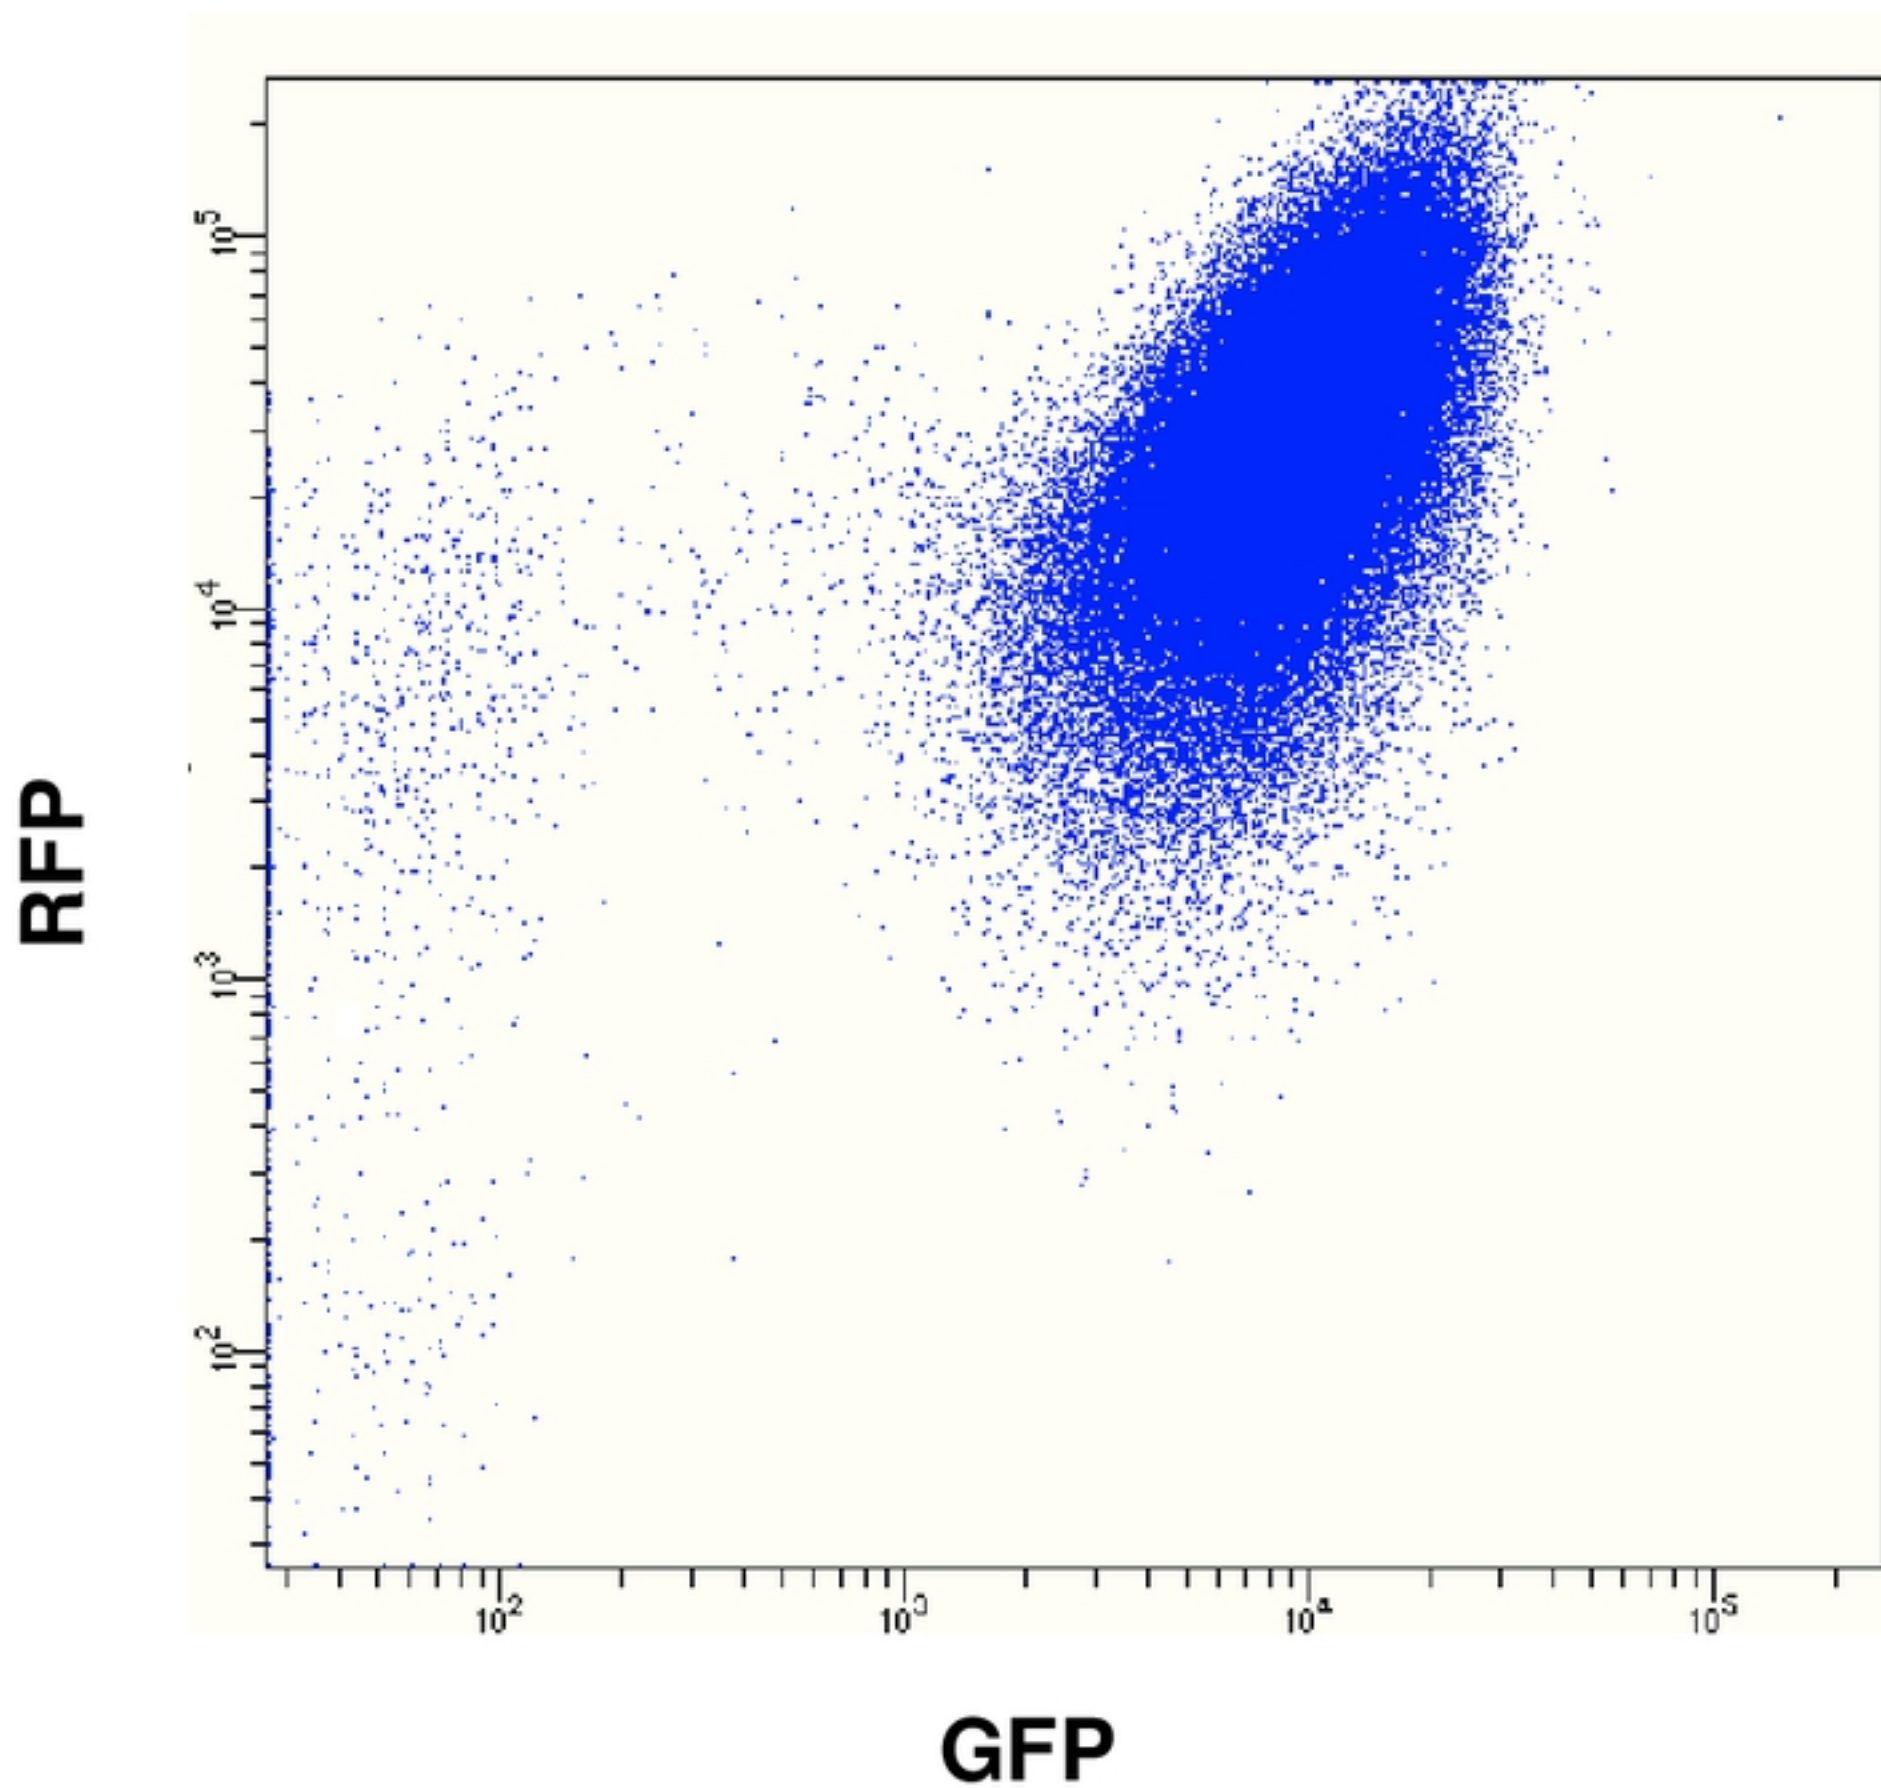

Figure 1

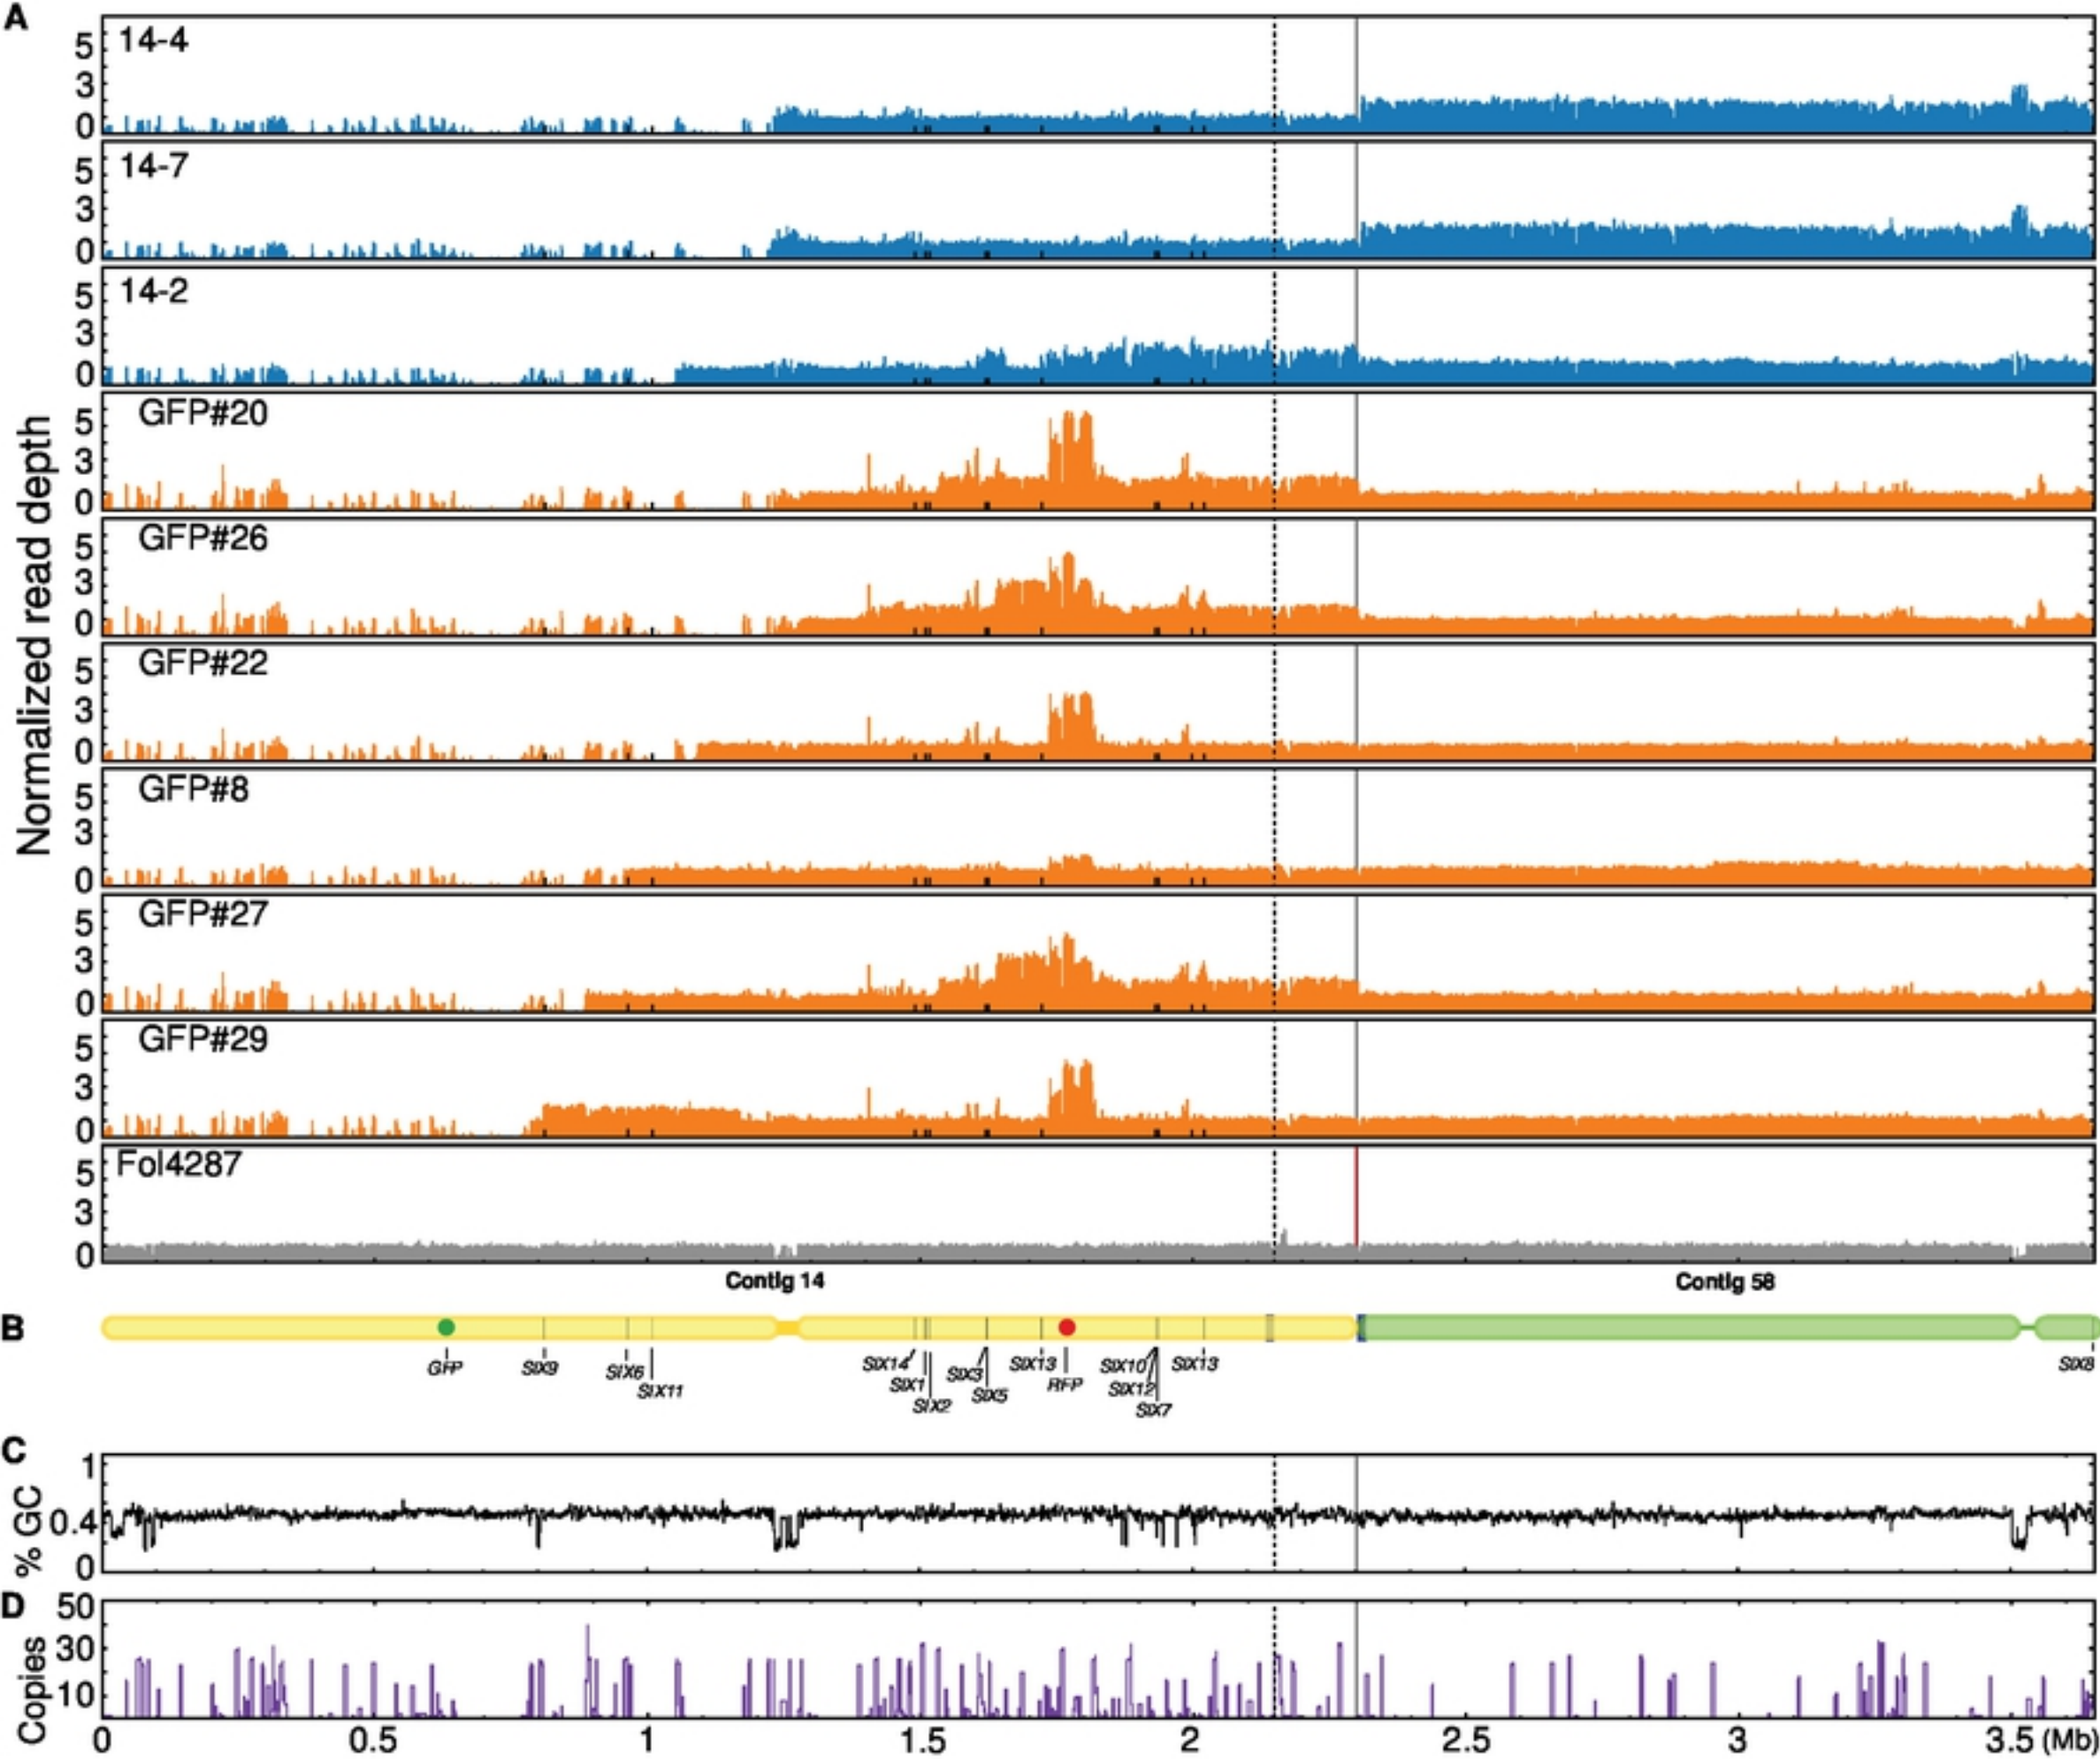

Figure 2

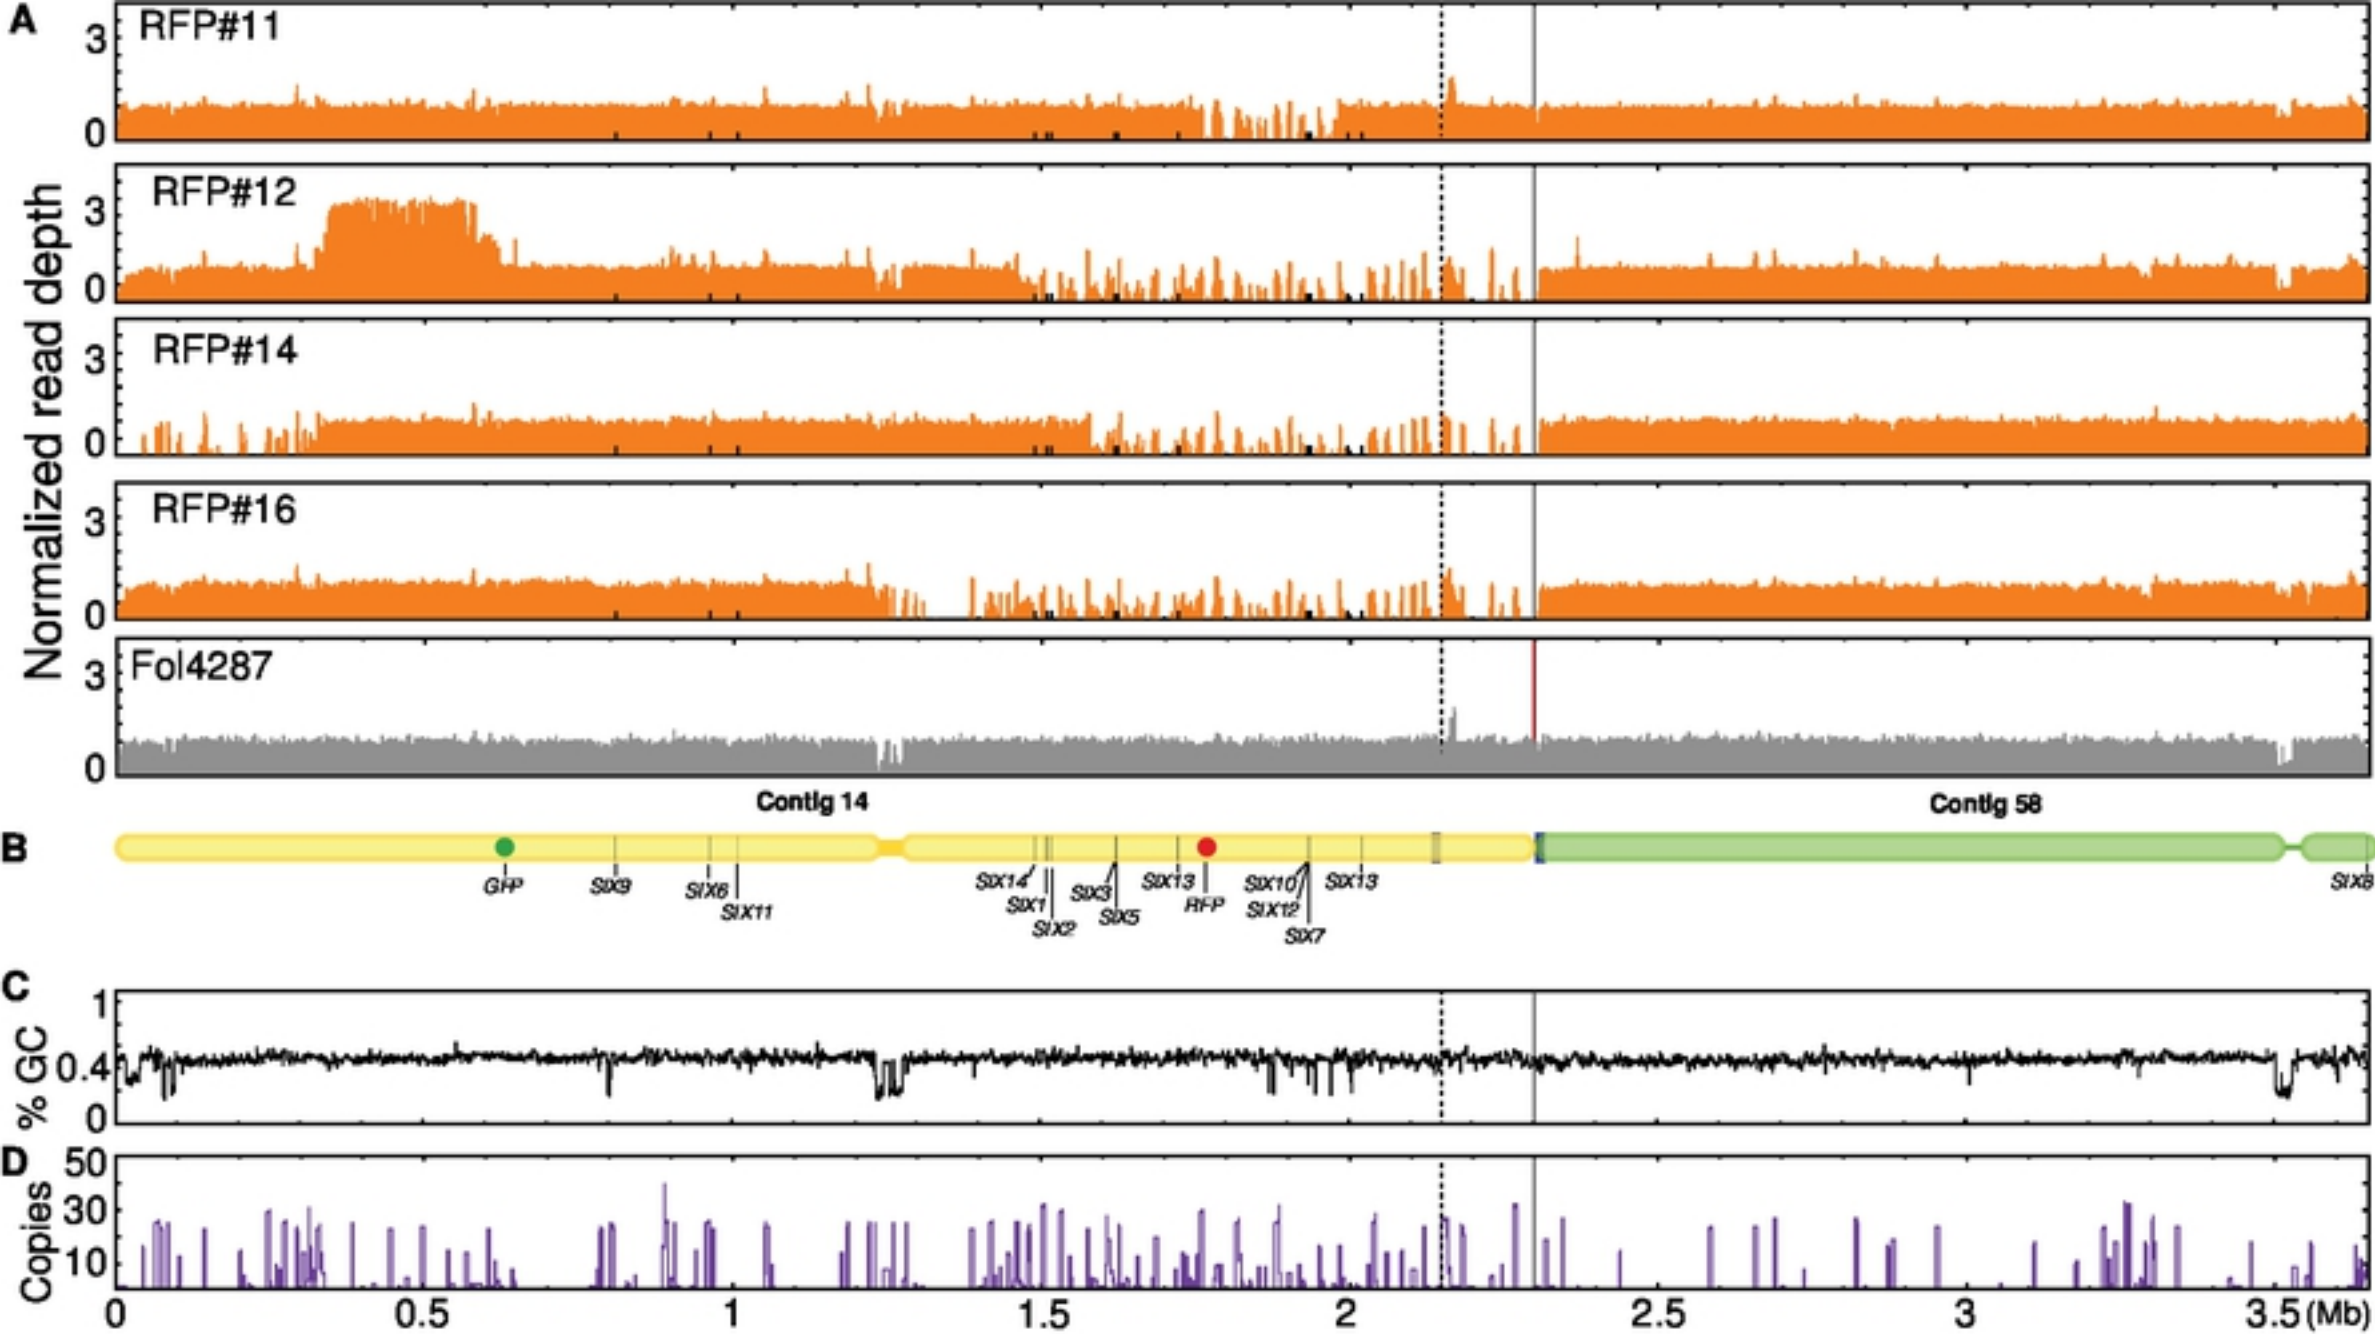

Figure 3

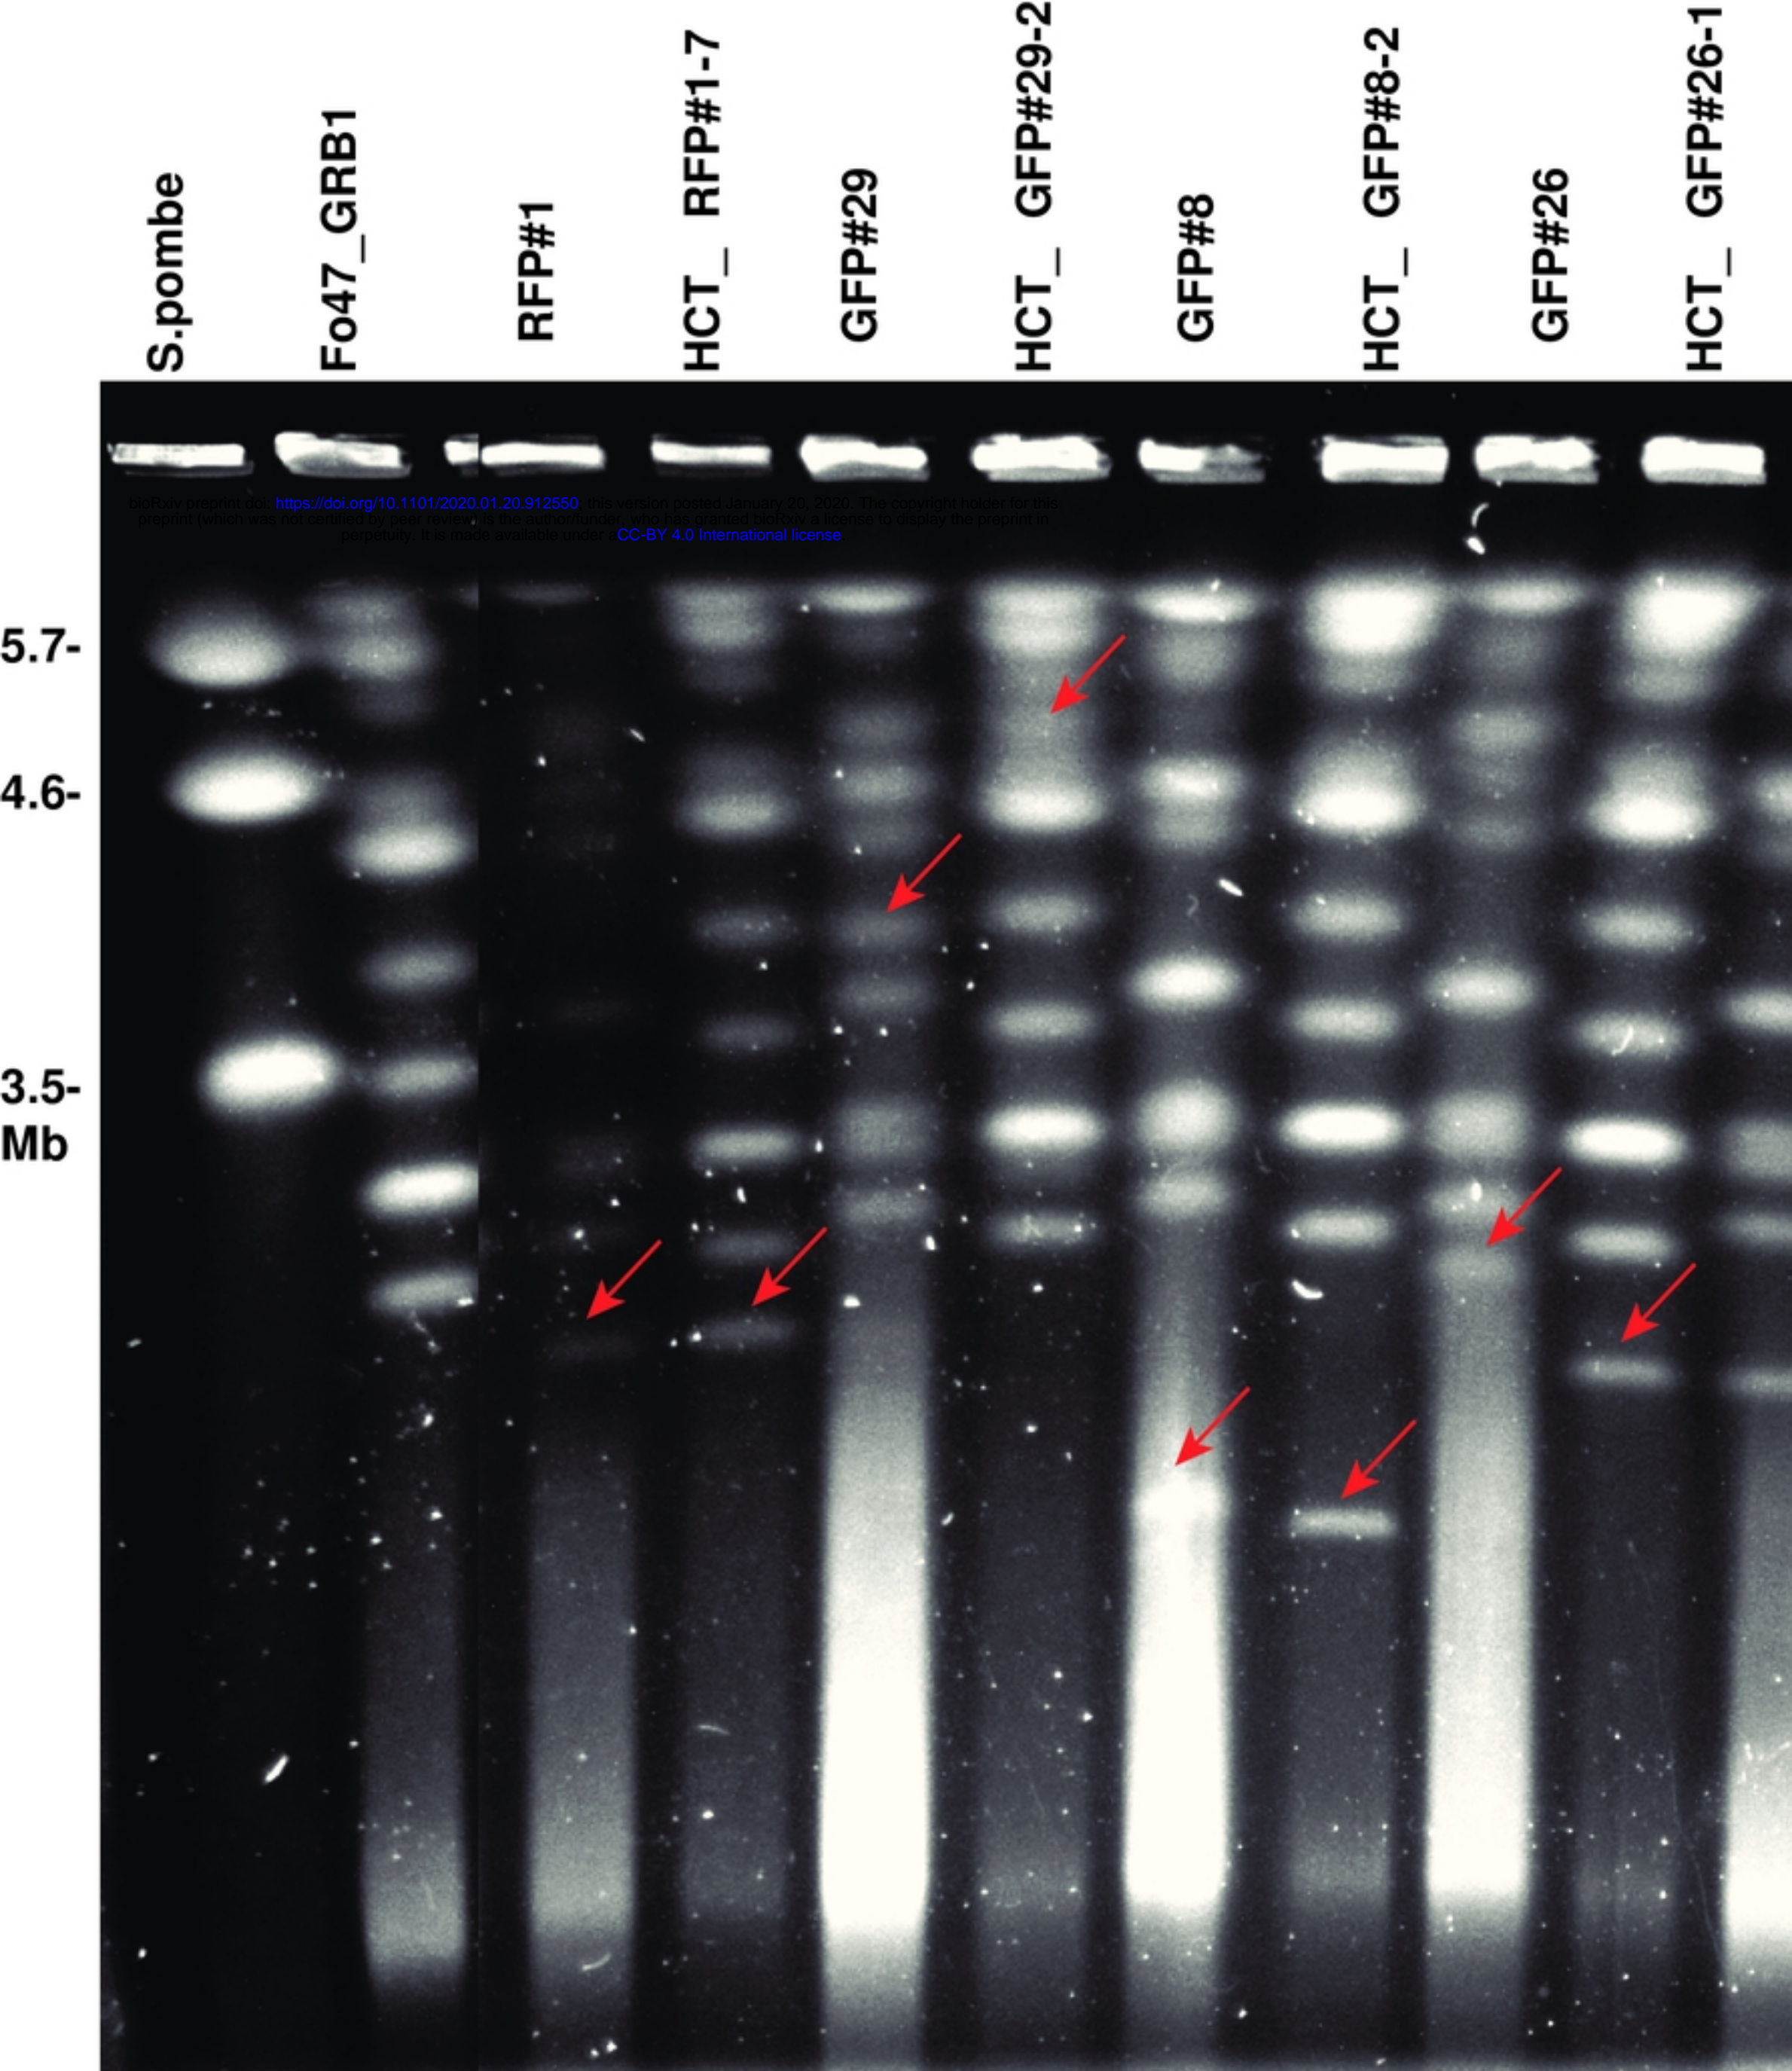

Figure 4

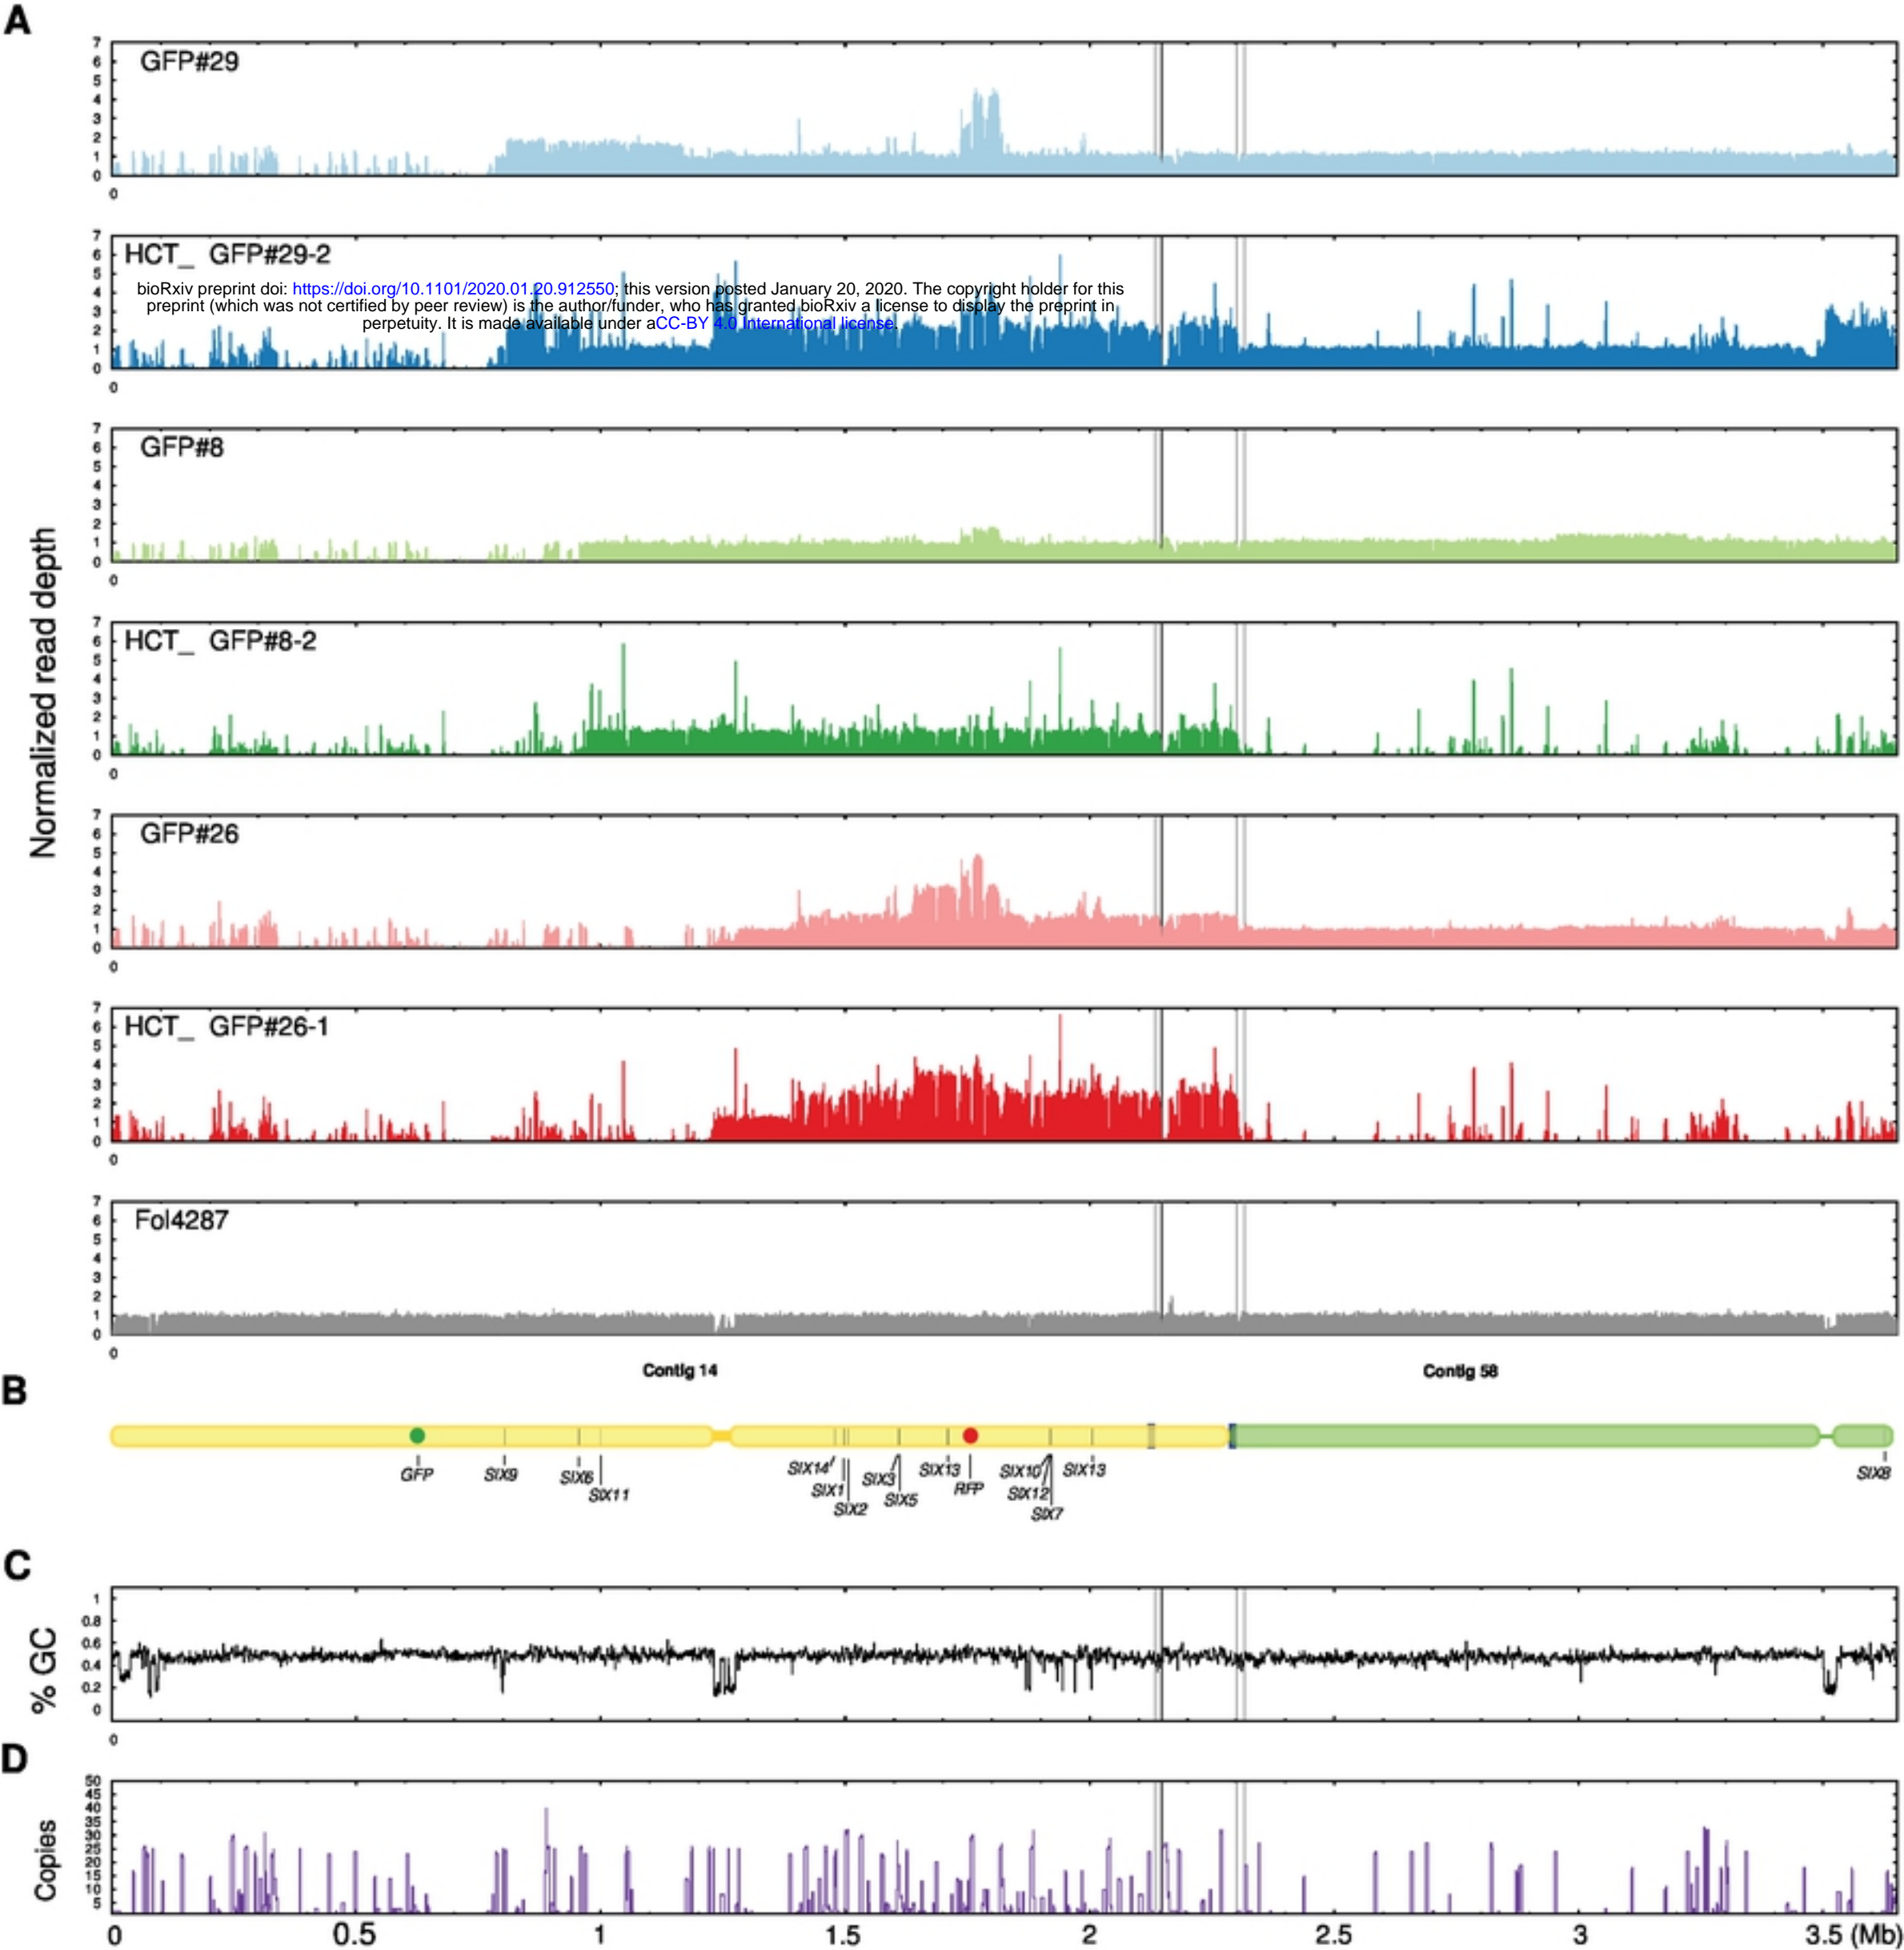

Figure 5

|         | <i>c</i> | <i>g</i> | <i>GFP</i> | <i>SIX9</i> | <i>SIX6</i> | <i>ORX1</i> | <i>SIX11</i> | <i>Cen</i> | <i>SIX14</i> | <i>SIX2</i> | <i>SIX3</i> | <i>SIX5</i> | <i>SIX13</i> | <i>RFP</i> | <i>SIX10</i> | <i>SIX12</i> | <i>SIX7</i> | <i>SIX13</i> | Bioassay_I | Bioassay |
|---------|----------|----------|------------|-------------|-------------|-------------|--------------|------------|--------------|-------------|-------------|-------------|--------------|------------|--------------|--------------|-------------|--------------|------------|----------|
| 14HG6B  | +        | +        | +          | +           | +           | +           | +            | +          | +            | +           | +           | +           | +            |            | +            | +            | +           | +            |            |          |
| 14HGPR  | +        | +        | +          | +           | +           | +           | +            | +          | +            | +           | +           | +           | +            | +          | +            | +            | +           | +            |            |          |
| 14-2    | -        | -        | -          | -           | -           | -           | -            | +          |              |             |             |             |              |            |              |              |             |              |            |          |
| 14-7    | -        | -        | -          | -           | -           | -           | -            | +          |              |             |             |             |              |            |              |              |             |              |            |          |
| ΔGFP#1  | -        | -        | -          | -           | +           |             |              |            |              |             |             |             |              | +          |              |              |             |              |            |          |
| ΔGFP#6  | -        | -        | -          | -           | -           |             |              | +          | +            |             |             |             |              | +          |              |              |             |              |            |          |
| ΔGFP#8  | -        | -        | -          | -           | -           | +           | +            | +          | +            |             |             |             |              | +          |              |              |             |              |            |          |
| ΔGFP#12 | -        | -        | -          | -           | -           |             |              | +          | +            |             |             |             |              | +          |              |              |             |              |            |          |
| ΔGFP#20 | -        | -        | -          | -           | -           | -           | -            | -          | +            |             | +           |             |              | +          | +            | +            | +           |              |            |          |
| ΔGFP#22 | -        | -        | -          | -           | -           | -           | -            | +          | +            | +           | +           | +           | +            | +          |              |              |             |              |            |          |
| ΔGFP#23 | -        | -        | -          | +           | +           | +           | +            | +          | +            | +           | +           | +           | +            | +          |              |              |             |              |            |          |
| ΔGFP#24 | +        | +        | -          | +           | +           | +           | +            | +          |              |             |             |             |              | +          |              |              |             |              |            |          |
| ΔGFP#26 | -        | -        | -          | -           | -           | -           | -            | +          | +            | +           |             | +           |              | +          |              |              |             |              |            |          |
| ΔGFP#27 | -        | -        | -          | -           | +           | -           | +            | +          | +            | +           |             | +           |              | +          |              |              |             |              |            |          |
| ΔGFP#29 | -        | -        | -          | +           | +           | +           | +            | +          | +            | +           |             | +           |              | +          |              |              |             |              |            |          |
| ΔGFP#30 | -        | -        | -          | -           | -           | -           | +            | -          | +            |             | +           | +           |              | +          | +            | +            | +           |              |            |          |
| ΔGFP#34 | +        | -        | -          | -           | +           | +           | +            | +          | +            | +           | +           | +           | +            | +          |              |              |             |              |            |          |
| ΔGFP#38 | +        | -        | -          | -           | +           | +           | +            | +          | +            | +           |             | +           |              | +          |              |              |             |              |            |          |
| ΔGFP#40 | -        | -        | -          | -           | -           | -           | -            | +          | +            | +           | +           | +           | +            | +          |              |              |             |              |            |          |
| ΔGFP#41 | -        | -        | -          | -           | +           | +           | +            | +          | +            | +           |             | +           |              | +          |              |              |             |              |            |          |
| ΔRFP#1  |          |          | +          |             |             |             |              |            | +            | +           |             | +           |              | -          |              |              | +           |              |            |          |
| ΔRFP#11 | +        | +        | +          | +           | +           | +           | +            | +          | +            | +           |             | +           | +            | -          | -            | -            | -           |              |            |          |
| ΔRFP#12 | +        | +        | +          | +           | +           | +           | +            | +          | -            | -           |             | -           | -            | -          | -            | -            | -           | -            |            |          |
| ΔRFP#14 |          |          | +          | +           |             |             | +            | +          | +            | +           | -           | -           | -            | -          |              |              | -           | -            |            |          |
| ΔRFP#16 |          |          | +          | +           |             |             | +            | -          | -            | -           | -           | -           | -            | -          |              |              | -           | -            |            |          |
| ΔRFP#18 |          |          | +          |             |             |             |              | +          | +            | +           | +           | +           |              | -          |              |              | +           |              |            |          |

Figure 6

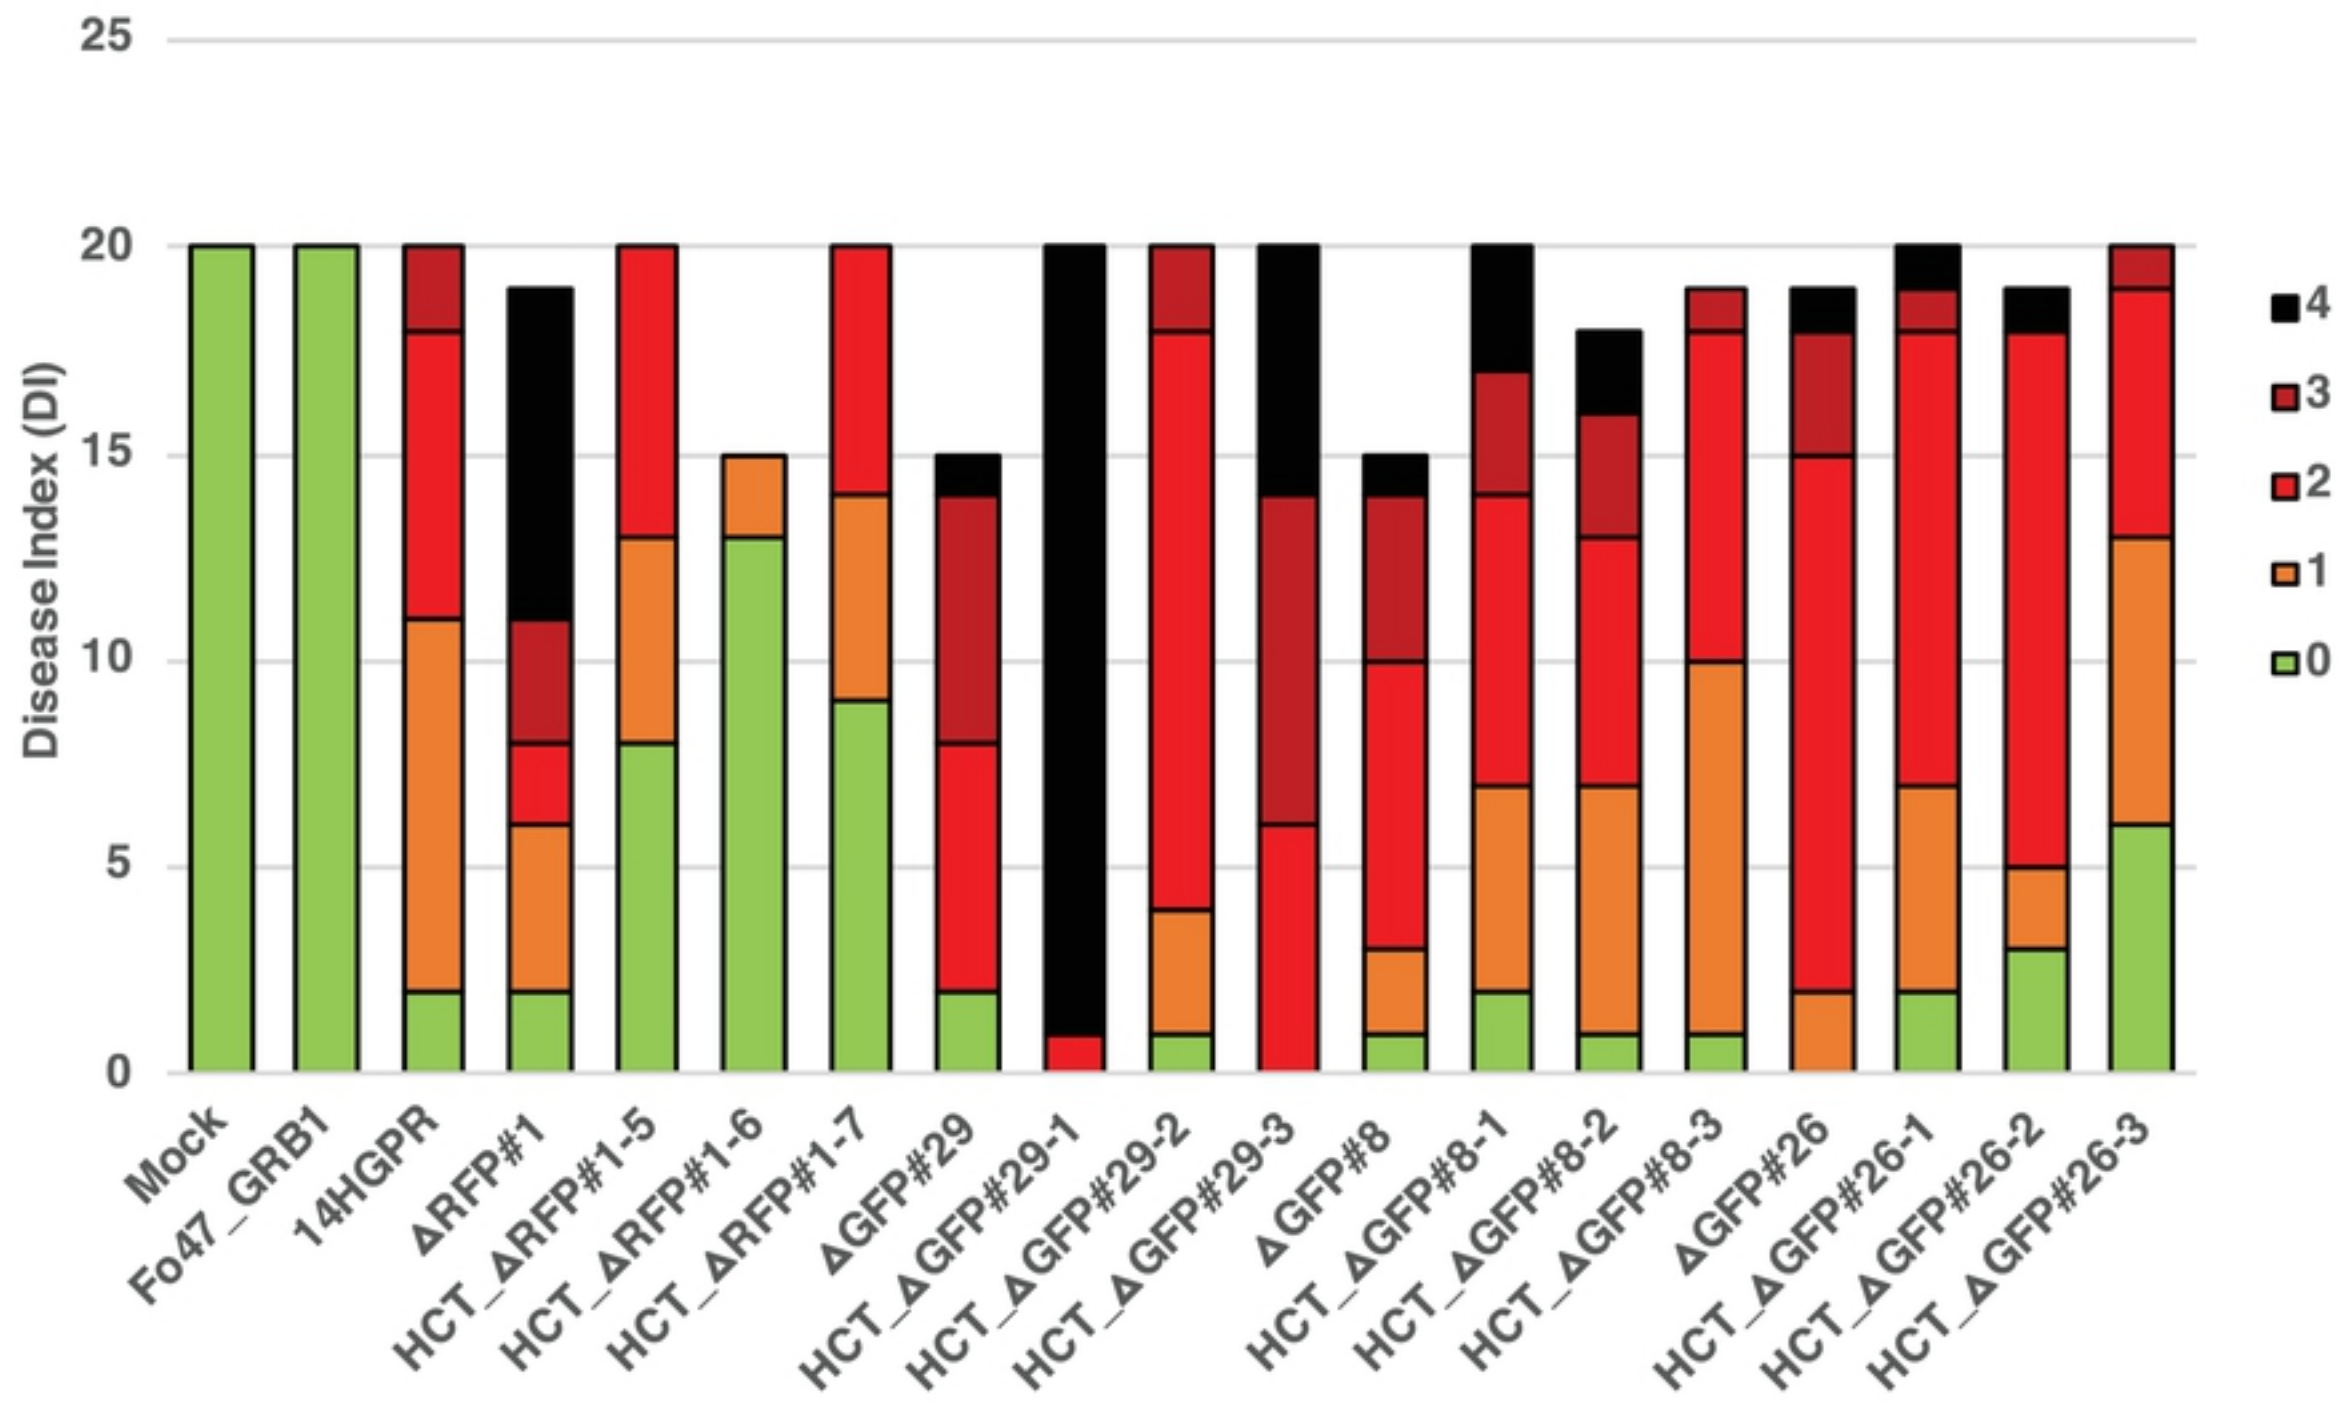

Figure 7



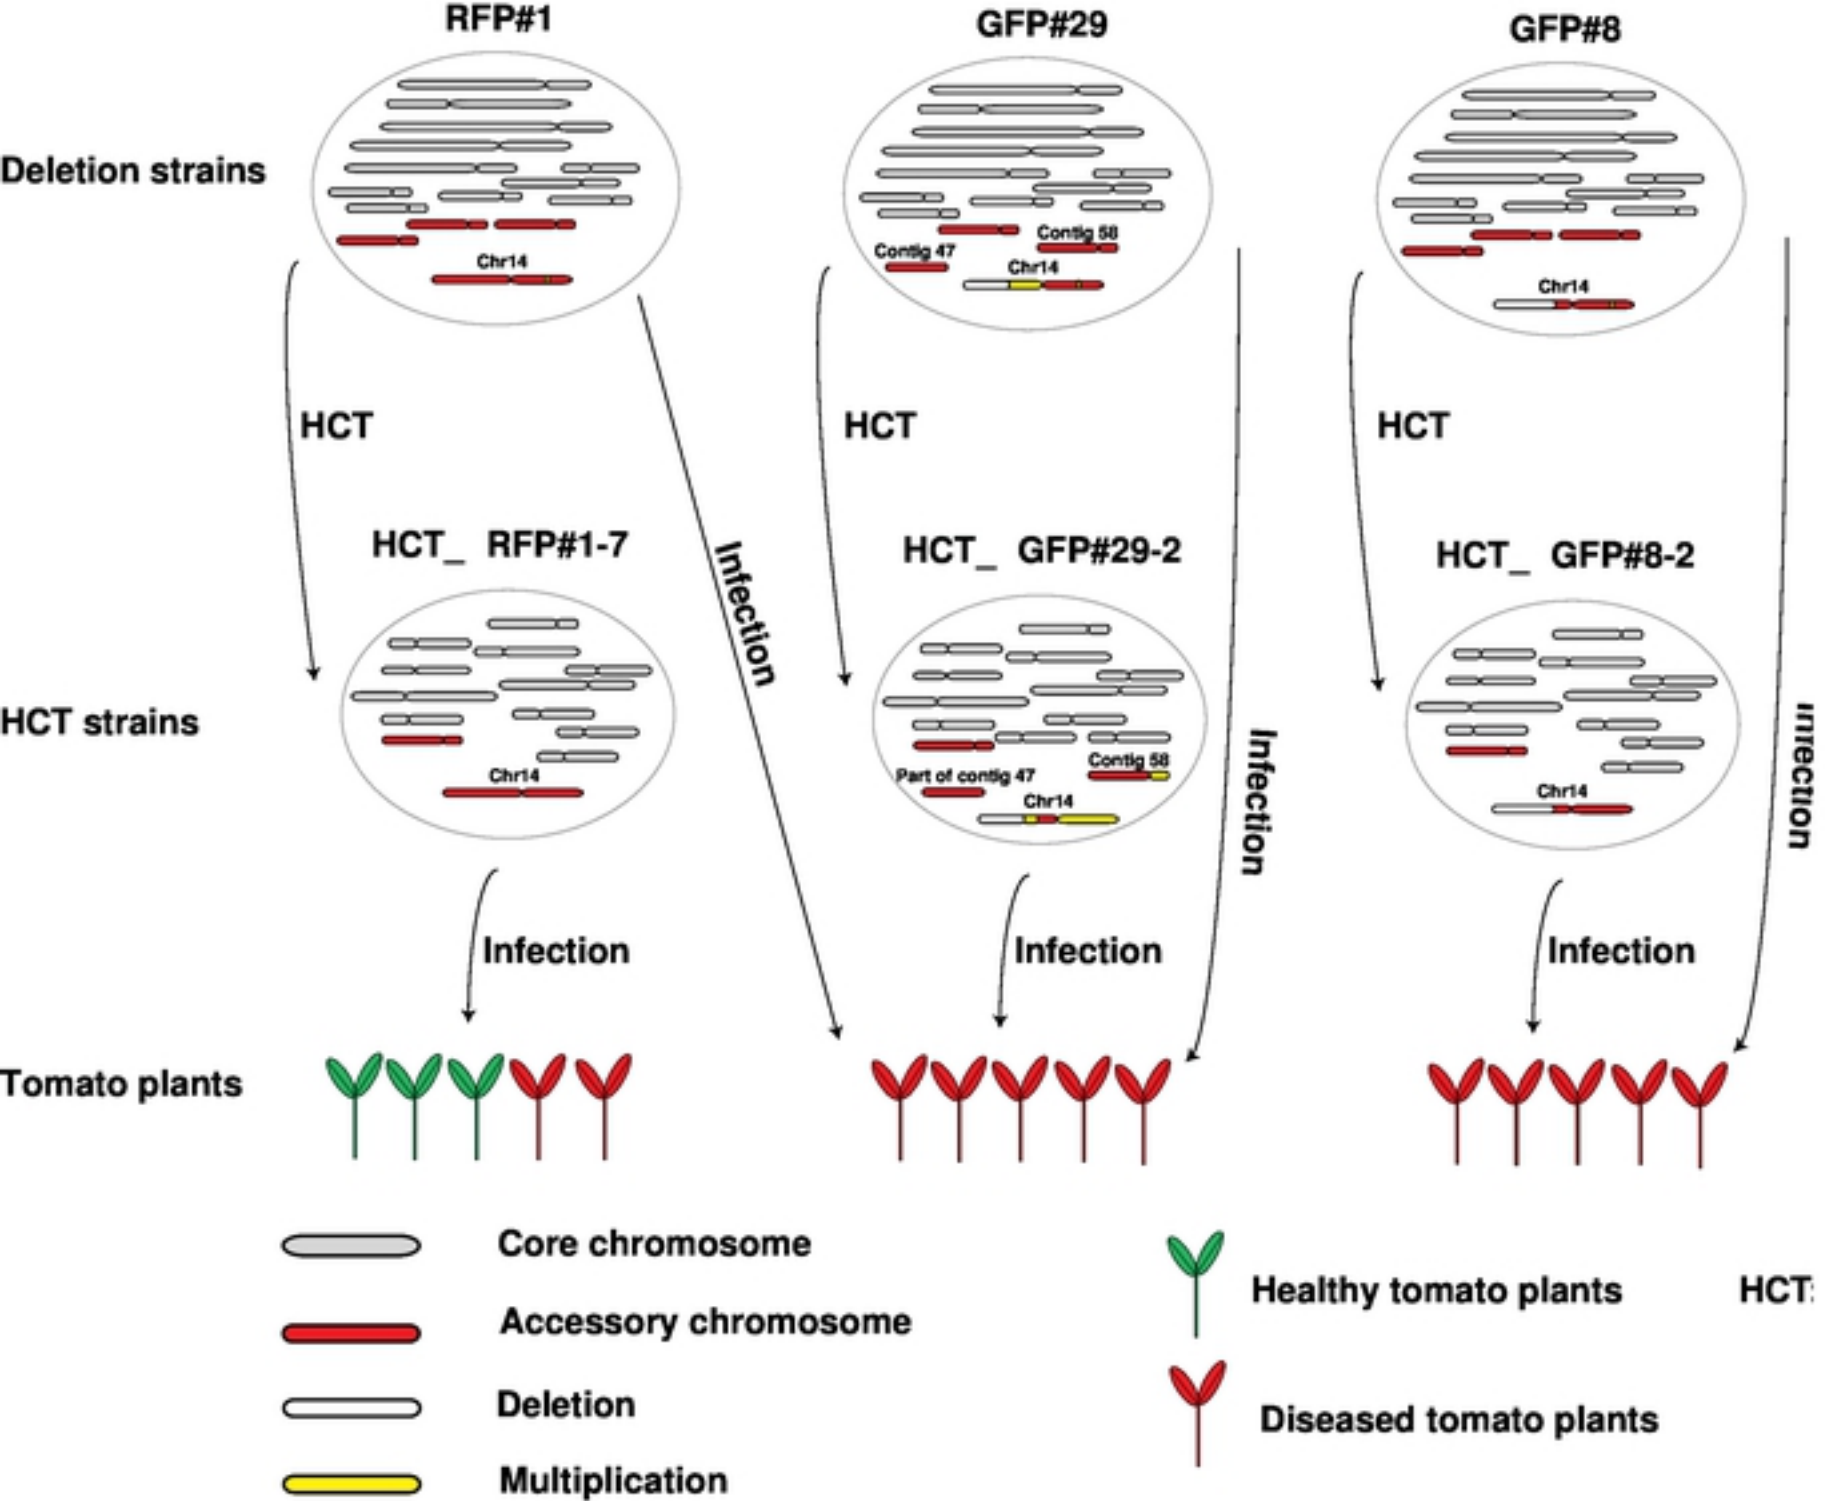

Figure 8
